# Supplementary material
Source: publisher site journal article supplement (https://www.dovepress.com/get_supplementary_file.php?f=186217-TS3.xlsx)
Supplement: Supplementary file 1 [file get_supplementary_file.php]

## Sheet: 186217-24-Jan-Table-S3 (1)
probeset	P-Value	Adjust Pval	Beta-Difference	Mean_A1_A2_A3_A4_A5_A6	Mean_B1_B2_B3_B4_B5_B6	GENOME_BUILD	CHR	MAPINFO	SOURCESEQ	CHROMOSOME_36	COORDINATE_36	UCSC_REFGENE_NAME	UCSC_REFGENE_ACCESSION	UCSC_REFGENE_GROUP	RELATION_TO_UCSC_CPG_ISLAND	ProbeName	p (Corr)	p	FC (abs)	Regulation	PrimaryAccession	RefSeqAccession	GenbankAccession	UniGeneID	EntrezGeneID	GeneSymbol	GeneName	EnsemblID	TIGRID	GO	Description	GenomicCoordinates	Cytoband	Sequence	Oppsite_trend
cg18267381	1.3e-05	0.0068514	0.215	0.3805	0.1655	37	3	21792434	GCTCTGCTCTACGTGCCAGCCTTGGGTGAGAGCTGATGCTGAAGACACCG	3	21767438	ZNF385D	NM_024697;NM_024697	1stExon		A_21_P0013971	0.0401562	0.00235067	2.52957	down	ENST00000497570		BX104753	Hs.742358	79750	ZNF385D	zinc finger protein 385D	ENST00000497570	THC2699452	GO:0003676(nucleic acid binding)|GO:0005634(nucleus)|GO:0008270(zinc ion binding)	zinc finger protein 385D [Source:HGNC Symbol;Acc:HGNC:26191] [ENST00000497570]	chr3:22175335-22175276	hs|3p24.3	GCAATTTCCACAGATGCTTTGTTTGTGGAGAAAAGTAGGATGGCCCCTCTGCTTGTCTTA	TRUE
cg04947157	0.000192999	0.0124274	-0.286	0.316667	0.602667	37	17	76128481	AAGCTTGCGGTGAGCAGCAGGCTCAGCAGGTTGAGTAGCAGCAGGAAGCG	17	73640076	TMC6	NM_152468;NM_007267;NM_007267	1stExon	S_Shore	A_23_P101013	0.0310303	0.000790117	5.05428	up	NM_007267	NM_007267	NM_007267	Hs.632227	11322	TMC6	transmembrane channel-like 6	ENST00000591436	THC2751094	GO:0005515(protein binding)|GO:0005737(cytoplasm)|GO:0005783(endoplasmic reticulum)|GO:0005789(endoplasmic reticulum membrane)|GO:0005794(Golgi apparatus)|GO:0006811(ion transport)|GO:0008150(biological_process)|GO:0016021(integral to membrane)|GO:0031965(nuclear membrane)|GO:0070062(extracellular vesicular exosome)	Homo sapiens transmembrane channel-like 6 (TMC6), transcript variant 2, mRNA [NM_007267]	chr17:76113361-76109658	hs|17q25.3	CAGATCAGCAATGAGGGTGAGGACAAAATCTTCTTAATCAACAAGCTTCACTCCATCTAC	TRUE
cg24266651	0.00104722	0.022441	0.223667	0.754333	0.530667	37	11	7506655	CCTTTTTACTTTTGCTTTCCTCCTCCCTAGTGGATTCTGCAGTCCAATCG	11	7463231	OLFML1	NM_198474;NM_198474	1stExon		A_23_P147665	0.030849	0.000761226	3.14119	down	NM_198474	NM_198474	NM_198474	Hs.503500	283298	OLFML1	olfactomedin-like 1	ENST00000329293	THC2470509	GO:0005576(extracellular region)	Homo sapiens olfactomedin-like 1 (OLFML1), mRNA [NM_198474]	chr11:7531816-7531875	hs|11p15.4	GCTGAAGCTCTTCCCTCTTTTTCAAATGTCTATTGATATTCTCCCATTTTCACTGCCCAA	TRUE
cg04810997	1.18e-05	0.00672553	-0.226167	0.716333	0.9425	37	7	143140674	CGCCCAGAGCAGCAGTGATGAAGCCATTGCCTGCTATTGCTACCAGGCGT	7	142850796	TAS2R60	NM_177437	1stExon		A_23_P367013	0.0378952	0.00197722	2.37935	up	NM_177437	NM_177437	NM_177437	Hs.688222	338398	TAS2R60	taste receptor, type 2, member 60	ENST00000332690	THC2603052	GO:0001580(detection of chemical stimulus involved in sensory perception of bitter taste)|GO:0004930(G-protein coupled receptor activity)|GO:0005886(plasma membrane)|GO:0007186(G-protein coupled receptor signaling pathway)|GO:0016021(integral to membrane)|GO:0033038(bitter taste receptor activity)|GO:0050913(sensory perception of bitter taste)	Homo sapiens taste receptor, type 2, member 60 (TAS2R60), mRNA [NM_177437]	chr7:143140735-143140794	hs|7q35	GCCTCTCGCTTCTGTCTGCAGTCAGTGGTAATGGGTAAGACCATTTATGTTTTCTTGCAT	TRUE
cg15085086	0.00084444	0.0206666	0.201167	0.480167	0.279	37	6	154360894	GTTTCCGAAGAGCCCCACCACGCACACGATGGAGTAGAGGGCCATGATCG	6	154402587	OPRM1	NM_001145286;NM_001145282;NM_001145281;NM_001145283;NM_001008505;NM_001145285;NM_001008503;NM_001145284;NM_001145280;NM_001008504;NM_001145279;NM_000914	1stExon	Island	A_24_P397613	0.0258475	0.000256388	3.19877	down	NM_001008504	NM_001008504	NM_001008504	Hs.2353	4988	OPRM1	opioid receptor, mu 1	ENST00000519613	NP1455637	GO:0001965(G-protein alpha-subunit binding)|GO:0002438(acute inflammatory response to antigenic stimulus)|GO:0004930(G-protein coupled receptor activity)|GO:0004979(beta-endorphin receptor activity)|GO:0005245(voltage-gated calcium channel activity)|GO:0005515(protein binding)|GO:0005783(endoplasmic reticulum)|GO:0005794(Golgi apparatus)|GO:0005886(plasma membrane)|GO:0005887(integral to plasma m…	Homo sapiens opioid receptor, mu 1 (OPRM1), transcript variant MOR-1A, mRNA [NM_001008504]	chr6:154412328-154412387	hs|6q25.2	GACTCCCATTCACATTTACGTCATCATTAAAGCCTTGGTTACAATCCCAGAAACTACGTT	TRUE
cg15085086	0.00084444	0.0206666	0.201167	0.480167	0.279	37	6	154360894	GTTTCCGAAGAGCCCCACCACGCACACGATGGAGTAGAGGGCCATGATCG	6	154402587	OPRM1	NM_001145286;NM_001145282;NM_001145281;NM_001145283;NM_001008505;NM_001145285;NM_001008503;NM_001145284;NM_001145280;NM_001008504;NM_001145279;NM_000914	1stExon	Island	A_24_P397613	0.0258475	0.000256388	3.19877	down	NM_001008504	NM_001008504	NM_001008504	Hs.2353	4988	OPRM1	opioid receptor, mu 1	ENST00000519613	NP1455637	GO:0001965(G-protein alpha-subunit binding)|GO:0002438(acute inflammatory response to antigenic stimulus)|GO:0004930(G-protein coupled receptor activity)|GO:0004979(beta-endorphin receptor activity)|GO:0005245(voltage-gated calcium channel activity)|GO:0005515(protein binding)|GO:0005783(endoplasmic reticulum)|GO:0005794(Golgi apparatus)|GO:0005886(plasma membrane)|GO:0005887(integral to plasma m…	Homo sapiens opioid receptor, mu 1 (OPRM1), transcript variant MOR-1A, mRNA [NM_001008504]	chr6:154412328-154412387	hs|6q25.2	GACTCCCATTCACATTTACGTCATCATTAAAGCCTTGGTTACAATCCCAGAAACTACGTT	TRUE
cg15085086	0.00084444	0.0206666	0.201167	0.480167	0.279	37	6	154360894	GTTTCCGAAGAGCCCCACCACGCACACGATGGAGTAGAGGGCCATGATCG	6	154402587	OPRM1	NM_001145286;NM_001145282;NM_001145281;NM_001145283;NM_001008505;NM_001145285;NM_001008503;NM_001145284;NM_001145280;NM_001008504;NM_001145279;NM_000914	1stExon	Island	A_24_P397613	0.0258475	0.000256388	3.19877	down	NM_001008504	NM_001008504	NM_001008504	Hs.2353	4988	OPRM1	opioid receptor, mu 1	ENST00000519613	NP1455637	GO:0001965(G-protein alpha-subunit binding)|GO:0002438(acute inflammatory response to antigenic stimulus)|GO:0004930(G-protein coupled receptor activity)|GO:0004979(beta-endorphin receptor activity)|GO:0005245(voltage-gated calcium channel activity)|GO:0005515(protein binding)|GO:0005783(endoplasmic reticulum)|GO:0005794(Golgi apparatus)|GO:0005886(plasma membrane)|GO:0005887(integral to plasma m…	Homo sapiens opioid receptor, mu 1 (OPRM1), transcript variant MOR-1A, mRNA [NM_001008504]	chr6:154412328-154412387	hs|6q25.2	GACTCCCATTCACATTTACGTCATCATTAAAGCCTTGGTTACAATCCCAGAAACTACGTT	TRUE
cg15085086	0.00084444	0.0206666	0.201167	0.480167	0.279	37	6	154360894	GTTTCCGAAGAGCCCCACCACGCACACGATGGAGTAGAGGGCCATGATCG	6	154402587	OPRM1	NM_001145286;NM_001145282;NM_001145281;NM_001145283;NM_001008505;NM_001145285;NM_001008503;NM_001145284;NM_001145280;NM_001008504;NM_001145279;NM_000914	1stExon	Island	A_24_P397613	0.0258475	0.000256388	3.19877	down	NM_001008504	NM_001008504	NM_001008504	Hs.2353	4988	OPRM1	opioid receptor, mu 1	ENST00000519613	NP1455637	GO:0001965(G-protein alpha-subunit binding)|GO:0002438(acute inflammatory response to antigenic stimulus)|GO:0004930(G-protein coupled receptor activity)|GO:0004979(beta-endorphin receptor activity)|GO:0005245(voltage-gated calcium channel activity)|GO:0005515(protein binding)|GO:0005783(endoplasmic reticulum)|GO:0005794(Golgi apparatus)|GO:0005886(plasma membrane)|GO:0005887(integral to plasma m…	Homo sapiens opioid receptor, mu 1 (OPRM1), transcript variant MOR-1A, mRNA [NM_001008504]	chr6:154412328-154412387	hs|6q25.2	GACTCCCATTCACATTTACGTCATCATTAAAGCCTTGGTTACAATCCCAGAAACTACGTT	TRUE
cg15085086	0.00084444	0.0206666	0.201167	0.480167	0.279	37	6	154360894	GTTTCCGAAGAGCCCCACCACGCACACGATGGAGTAGAGGGCCATGATCG	6	154402587	OPRM1	NM_001145286;NM_001145282;NM_001145281;NM_001145283;NM_001008505;NM_001145285;NM_001008503;NM_001145284;NM_001145280;NM_001008504;NM_001145279;NM_000914	1stExon	Island	A_24_P397613	0.0258475	0.000256388	3.19877	down	NM_001008504	NM_001008504	NM_001008504	Hs.2353	4988	OPRM1	opioid receptor, mu 1	ENST00000519613	NP1455637	GO:0001965(G-protein alpha-subunit binding)|GO:0002438(acute inflammatory response to antigenic stimulus)|GO:0004930(G-protein coupled receptor activity)|GO:0004979(beta-endorphin receptor activity)|GO:0005245(voltage-gated calcium channel activity)|GO:0005515(protein binding)|GO:0005783(endoplasmic reticulum)|GO:0005794(Golgi apparatus)|GO:0005886(plasma membrane)|GO:0005887(integral to plasma m…	Homo sapiens opioid receptor, mu 1 (OPRM1), transcript variant MOR-1A, mRNA [NM_001008504]	chr6:154412328-154412387	hs|6q25.2	GACTCCCATTCACATTTACGTCATCATTAAAGCCTTGGTTACAATCCCAGAAACTACGTT	TRUE
cg15085086	0.00084444	0.0206666	0.201167	0.480167	0.279	37	6	154360894	GTTTCCGAAGAGCCCCACCACGCACACGATGGAGTAGAGGGCCATGATCG	6	154402587	OPRM1	NM_001145286;NM_001145282;NM_001145281;NM_001145283;NM_001008505;NM_001145285;NM_001008503;NM_001145284;NM_001145280;NM_001008504;NM_001145279;NM_000914	1stExon	Island	A_24_P397613	0.0258475	0.000256388	3.19877	down	NM_001008504	NM_001008504	NM_001008504	Hs.2353	4988	OPRM1	opioid receptor, mu 1	ENST00000519613	NP1455637	GO:0001965(G-protein alpha-subunit binding)|GO:0002438(acute inflammatory response to antigenic stimulus)|GO:0004930(G-protein coupled receptor activity)|GO:0004979(beta-endorphin receptor activity)|GO:0005245(voltage-gated calcium channel activity)|GO:0005515(protein binding)|GO:0005783(endoplasmic reticulum)|GO:0005794(Golgi apparatus)|GO:0005886(plasma membrane)|GO:0005887(integral to plasma m…	Homo sapiens opioid receptor, mu 1 (OPRM1), transcript variant MOR-1A, mRNA [NM_001008504]	chr6:154412328-154412387	hs|6q25.2	GACTCCCATTCACATTTACGTCATCATTAAAGCCTTGGTTACAATCCCAGAAACTACGTT	TRUE
cg15085086	0.00084444	0.0206666	0.201167	0.480167	0.279	37	6	154360894	GTTTCCGAAGAGCCCCACCACGCACACGATGGAGTAGAGGGCCATGATCG	6	154402587	OPRM1	NM_001145286;NM_001145282;NM_001145281;NM_001145283;NM_001008505;NM_001145285;NM_001008503;NM_001145284;NM_001145280;NM_001008504;NM_001145279;NM_000914	1stExon	Island	A_24_P397613	0.0258475	0.000256388	3.19877	down	NM_001008504	NM_001008504	NM_001008504	Hs.2353	4988	OPRM1	opioid receptor, mu 1	ENST00000519613	NP1455637	GO:0001965(G-protein alpha-subunit binding)|GO:0002438(acute inflammatory response to antigenic stimulus)|GO:0004930(G-protein coupled receptor activity)|GO:0004979(beta-endorphin receptor activity)|GO:0005245(voltage-gated calcium channel activity)|GO:0005515(protein binding)|GO:0005783(endoplasmic reticulum)|GO:0005794(Golgi apparatus)|GO:0005886(plasma membrane)|GO:0005887(integral to plasma m…	Homo sapiens opioid receptor, mu 1 (OPRM1), transcript variant MOR-1A, mRNA [NM_001008504]	chr6:154412328-154412387	hs|6q25.2	GACTCCCATTCACATTTACGTCATCATTAAAGCCTTGGTTACAATCCCAGAAACTACGTT	TRUE
cg15085086	0.00084444	0.0206666	0.201167	0.480167	0.279	37	6	154360894	GTTTCCGAAGAGCCCCACCACGCACACGATGGAGTAGAGGGCCATGATCG	6	154402587	OPRM1	NM_001145286;NM_001145282;NM_001145281;NM_001145283;NM_001008505;NM_001145285;NM_001008503;NM_001145284;NM_001145280;NM_001008504;NM_001145279;NM_000914	1stExon	Island	A_24_P397613	0.0258475	0.000256388	3.19877	down	NM_001008504	NM_001008504	NM_001008504	Hs.2353	4988	OPRM1	opioid receptor, mu 1	ENST00000519613	NP1455637	GO:0001965(G-protein alpha-subunit binding)|GO:0002438(acute inflammatory response to antigenic stimulus)|GO:0004930(G-protein coupled receptor activity)|GO:0004979(beta-endorphin receptor activity)|GO:0005245(voltage-gated calcium channel activity)|GO:0005515(protein binding)|GO:0005783(endoplasmic reticulum)|GO:0005794(Golgi apparatus)|GO:0005886(plasma membrane)|GO:0005887(integral to plasma m…	Homo sapiens opioid receptor, mu 1 (OPRM1), transcript variant MOR-1A, mRNA [NM_001008504]	chr6:154412328-154412387	hs|6q25.2	GACTCCCATTCACATTTACGTCATCATTAAAGCCTTGGTTACAATCCCAGAAACTACGTT	TRUE
cg15085086	0.00084444	0.0206666	0.201167	0.480167	0.279	37	6	154360894	GTTTCCGAAGAGCCCCACCACGCACACGATGGAGTAGAGGGCCATGATCG	6	154402587	OPRM1	NM_001145286;NM_001145282;NM_001145281;NM_001145283;NM_001008505;NM_001145285;NM_001008503;NM_001145284;NM_001145280;NM_001008504;NM_001145279;NM_000914	1stExon	Island	A_24_P397613	0.0258475	0.000256388	3.19877	down	NM_001008504	NM_001008504	NM_001008504	Hs.2353	4988	OPRM1	opioid receptor, mu 1	ENST00000519613	NP1455637	GO:0001965(G-protein alpha-subunit binding)|GO:0002438(acute inflammatory response to antigenic stimulus)|GO:0004930(G-protein coupled receptor activity)|GO:0004979(beta-endorphin receptor activity)|GO:0005245(voltage-gated calcium channel activity)|GO:0005515(protein binding)|GO:0005783(endoplasmic reticulum)|GO:0005794(Golgi apparatus)|GO:0005886(plasma membrane)|GO:0005887(integral to plasma m…	Homo sapiens opioid receptor, mu 1 (OPRM1), transcript variant MOR-1A, mRNA [NM_001008504]	chr6:154412328-154412387	hs|6q25.2	GACTCCCATTCACATTTACGTCATCATTAAAGCCTTGGTTACAATCCCAGAAACTACGTT	TRUE
cg00939495	0.000727016	0.0195707	0.216	0.489167	0.273167	37	4	9783398	GGTGCGCCCCTCCAGTCTCCGCGATGGGGACAGGAAGCGGCTGGTGCTCG	4	9392496	DRD5	NM_000798;NM_000798	1stExon	Island	A_24_P862886	0.0341166	0.00129144	3.19041	down	NM_000798	NM_000798	NM_000798	Hs.380681	1816	DRD5	dopamine receptor D5	ENST00000421395	NP511193	GO:0001588(dopamine receptor activity, coupled via Gs)|GO:0001963(synaptic transmission, dopaminergic)|GO:0001975(response to amphetamine)|GO:0001992(regulation of systemic arterial blood pressure by vasopressin)|GO:0001994(norepinephrine-epinephrine vasoconstriction involved in regulation of systemic arterial blood pressure)|GO:0004952(dopamine receptor activity)|GO:0005886(plasma membrane)|GO:0…	Homo sapiens dopamine receptor D5 (DRD5), mRNA [NM_000798]	chr4:9784811-9784870	hs|4p16.1	GGTGAACATCAGCAATGAGCTCATCTCCTACAACCAAGACATGGTCTTCCACAAGGAAAT	TRUE
cg03565189	0.000341411	0.0149613	0.226333	0.370333	0.144	37	11	69924724	CGAGAAGTACTCGACGCTCCCGGCCGAGGACCGCAGCGTCCACATCATCA	11	69602372	ANO1	NM_018043	1stExon	Island	A_24_P87036	0.0250229	0.000138704	4.1999	down	NM_018043	NM_018043	NM_018043	Hs.503074	55107	ANO1	anoctamin 1, calcium activated chloride channel	ENST00000530676	THC2482452	GO:0005227(calcium activated cation channel activity)|GO:0005229(intracellular calcium activated chloride channel activity)|GO:0005515(protein binding)|GO:0005737(cytoplasm)|GO:0005886(plasma membrane)|GO:0006812(cation transport)|GO:0006821(chloride transport)|GO:0007275(multicellular organismal development)|GO:0009897(external side of plasma membrane)|GO:0016324(apical plasma membrane)|GO:00342…	Homo sapiens anoctamin 1, calcium activated chloride channel (ANO1), transcript variant 1, mRNA [NM_018043]	chr11:70035233-70035292	hs|11q13.3	ATGAGTGATCTAAATTTGCAGCAATGATACTAAACAACTCTCTGAAATTTCTCAAGCACC	TRUE
cg00609834	0.00115345	0.0233402	0.2065	0.383833	0.177333	37	11	13984596	ACCCTGGACAAAGTGCCCAAGTCAGAGGGCTACTGCAGCCGTATCCTGCG	11	13941172	SPON1	NM_006108	1stExon	Island	A_32_P133072	0.0296854	0.000614028	3.70236	down	NM_006108	NM_006108	NM_006108	Hs.643864	10418	SPON1	spondin 1, extracellular matrix protein	ENST00000576479	THC2468743	GO:0005515(protein binding)|GO:0005578(proteinaceous extracellular matrix)|GO:0005615(extracellular space)|GO:0005788(endoplasmic reticulum lumen)|GO:0006493(protein O-linked glycosylation)|GO:0007155(cell adhesion)|GO:0031012(extracellular matrix)|GO:0036066(protein O-linked fucosylation)|GO:0043687(post-translational protein modification)|GO:0044267(cellular protein metabolic process)	Homo sapiens spondin 1, extracellular matrix protein (SPON1), mRNA [NM_006108]	chr11:14289180-14289239	hs|11p15.2	ACCAGGTTAATGGCTAAGAATGGGTAACATGACTCTTGTTGGATTGTTATTTTTTGTTTG	TRUE
cg12581592	0.00348399	0.0380868	0.207	0.346167	0.139167	37	11	13984043	CGCCTAGGAGGCTGCTGCTCCAACCCCCAGCTACACTCCGGACCCTCTGG	11	13940619	SPON1	NM_006108;NM_006108	1stExon	N_Shore	A_32_P133072	0.0296854	0.000614028	3.70236	down	NM_006108	NM_006108	NM_006108	Hs.643864	10418	SPON1	spondin 1, extracellular matrix protein	ENST00000576479	THC2468743	GO:0005515(protein binding)|GO:0005578(proteinaceous extracellular matrix)|GO:0005615(extracellular space)|GO:0005788(endoplasmic reticulum lumen)|GO:0006493(protein O-linked glycosylation)|GO:0007155(cell adhesion)|GO:0031012(extracellular matrix)|GO:0036066(protein O-linked fucosylation)|GO:0043687(post-translational protein modification)|GO:0044267(cellular protein metabolic process)	Homo sapiens spondin 1, extracellular matrix protein (SPON1), mRNA [NM_006108]	chr11:14289180-14289239	hs|11p15.2	ACCAGGTTAATGGCTAAGAATGGGTAACATGACTCTTGTTGGATTGTTATTTTTTGTTTG	TRUE
cg20693209	0.00124727	0.0241119	0.218833	0.406333	0.1875	37	11	13984067	CGGACCCTGTGGGCTCTGTCCCATCGCCTAGGAGGCTGCTGCTCCAACCC	11	13940643	SPON1	NM_006108;NM_006108	1stExon	Island	A_32_P133072	0.0296854	0.000614028	3.70236	down	NM_006108	NM_006108	NM_006108	Hs.643864	10418	SPON1	spondin 1, extracellular matrix protein	ENST00000576479	THC2468743	GO:0005515(protein binding)|GO:0005578(proteinaceous extracellular matrix)|GO:0005615(extracellular space)|GO:0005788(endoplasmic reticulum lumen)|GO:0006493(protein O-linked glycosylation)|GO:0007155(cell adhesion)|GO:0031012(extracellular matrix)|GO:0036066(protein O-linked fucosylation)|GO:0043687(post-translational protein modification)|GO:0044267(cellular protein metabolic process)	Homo sapiens spondin 1, extracellular matrix protein (SPON1), mRNA [NM_006108]	chr11:14289180-14289239	hs|11p15.2	ACCAGGTTAATGGCTAAGAATGGGTAACATGACTCTTGTTGGATTGTTATTTTTTGTTTG	TRUE
cg03078169	0.000596921	0.0182316	0.220333	0.655833	0.4355	37	19	35629791	CGGGCTGTCCCCTGCTGAAAGAAGGCCCCCAAACGTCCTGCTGTGCCCCG	19	40321631	FXYD1	NM_021902;NM_021902;NM_005031	1stExon	N_Shelf	A_33_P3228435	0.0254975	0.000205004	4.02531	down	NM_001278717	NM_001278717	NM_001278717	Hs.442498	5348	FXYD1	FXYD domain containing ion transport regulator 1	ENST00000587056	THC2471806	GO:0005254(chloride channel activity)|GO:0005886(plasma membrane)|GO:0005887(integral to plasma membrane)|GO:0005890(sodium:potassium-exchanging ATPase complex)|GO:0006821(chloride transport)|GO:0006874(cellular calcium ion homeostasis)|GO:0006936(muscle contraction)|GO:0008016(regulation of heart contraction)|GO:0017080(sodium channel regulator activity)|GO:0034220(ion transmembrane transport)|G…	Homo sapiens FXYD domain containing ion transport regulator 1 (FXYD1), transcript variant c, mRNA [NM_001278717]	chr19:35630984-35631043	hs|19q13.12	ATGGCGTCTCTTGGCCACATCTTGGTTTTCTGTGTGGGTCTCCTCACCATGGCCAAGGCA	TRUE
cg21604615	7.61e-06	0.00646045	-0.229833	0.230333	0.460167	37	1	27668610	GGCACCGACACGTGTTACCTGTAGGGGTCCAGTATGGGAGGACACCTTCG	1	27541197	SYTL1	NM_032872;NM_032872	1stExon		A_33_P3235321	0.0250229	0.000107334	5.64922	up	NM_032872	NM_032872	NM_032872	Hs.469175	84958	SYTL1	synaptotagmin-like 1	ENST00000496001	THC2782501	GO:0005515(protein binding)|GO:0005886(plasma membrane)|GO:0006886(intracellular protein transport)|GO:0006887(exocytosis)|GO:0017137(Rab GTPase binding)|GO:0019897(extrinsic to plasma membrane)|GO:0042043(neurexin family protein binding)|GO:0042470(melanosome)|GO:0070062(extracellular vesicular exosome)	Homo sapiens synaptotagmin-like 1 (SYTL1), transcript variant 2, mRNA [NM_032872]	chr1:27676916-27676975	hs|1p36.11	CAAGCGCAAGACGGCGGTGAAGAAACGGAATCTGAATCCGGTTTTCAACGAGACTCTCCG	TRUE
cg04290586	0.0010674	0.0226253	0.221333	0.495667	0.274333	37	12	108168987	GTCTTCTTCTATTGAGAGATTGACCTCTTGAGTGATTTGTGTGCTTTCCG	12	106693117	ASCL4	NM_203436;NM_203436	1stExon	Island	A_33_P3287303	0.034266	0.00132515	2.70877	down	NM_203436	NM_203436	NM_203436	Hs.149910	121549	ASCL4	achaete-scute family bHLH transcription factor 4	ENST00000342331	THC2485888	GO:0003677(DNA binding)|GO:0005575(cellular_component)|GO:0005634(nucleus)|GO:0006351(transcription, DNA-dependent)|GO:0006357(regulation of transcription from RNA polymerase II promoter)|GO:0043588(skin development)|GO:0046983(protein dimerization activity)	Homo sapiens achaete-scute family bHLH transcription factor 4 (ASCL4), mRNA [NM_203436]	chr12:108170247-108170306	hs|12q23.3	AGAGCCCAGATTTGTATGAAAACTTGTTTTTCCTCTCAATTGTTTTGTCCACTGTTTTCT	TRUE
cg24856726	0.000935772	0.0214658	0.230833	0.340333	0.1095	37	12	108169333	CGCTCCGCGCTGCCATCGACTACATCAAGCACCTGCAGGAGCTGCTGGAG	12	106693463	ASCL4	NM_203436	1stExon	Island	A_33_P3287303	0.034266	0.00132515	2.70877	down	NM_203436	NM_203436	NM_203436	Hs.149910	121549	ASCL4	achaete-scute family bHLH transcription factor 4	ENST00000342331	THC2485888	GO:0003677(DNA binding)|GO:0005575(cellular_component)|GO:0005634(nucleus)|GO:0006351(transcription, DNA-dependent)|GO:0006357(regulation of transcription from RNA polymerase II promoter)|GO:0043588(skin development)|GO:0046983(protein dimerization activity)	Homo sapiens achaete-scute family bHLH transcription factor 4 (ASCL4), mRNA [NM_203436]	chr12:108170247-108170306	hs|12q23.3	AGAGCCCAGATTTGTATGAAAACTTGTTTTTCCTCTCAATTGTTTTGTCCACTGTTTTCT	TRUE
cg01295392	0.000603189	0.0182884	0.2315	0.461	0.2295	37	12	108169569	TGCCAGATTAAGAATGCAAACCACCTTCGAAGAGGACCTTAGGTTGAGCG	12	106693699	ASCL4	NM_203436;NM_203436	1stExon	Island	A_33_P3287303	0.034266	0.00132515	2.70877	down	NM_203436	NM_203436	NM_203436	Hs.149910	121549	ASCL4	achaete-scute family bHLH transcription factor 4	ENST00000342331	THC2485888	GO:0003677(DNA binding)|GO:0005575(cellular_component)|GO:0005634(nucleus)|GO:0006351(transcription, DNA-dependent)|GO:0006357(regulation of transcription from RNA polymerase II promoter)|GO:0043588(skin development)|GO:0046983(protein dimerization activity)	Homo sapiens achaete-scute family bHLH transcription factor 4 (ASCL4), mRNA [NM_203436]	chr12:108170247-108170306	hs|12q23.3	AGAGCCCAGATTTGTATGAAAACTTGTTTTTCCTCTCAATTGTTTTGTCCACTGTTTTCT	TRUE
cg20443254	0.000442466	0.0163146	0.302333	0.417667	0.115333	37	12	108169020	GATTTGTGTGCTTTCCGGCAAATGATGGAGACGCGTAAACCGGCGGAACG	12	106693150	ASCL4	NM_203436	1stExon	Island	A_33_P3287303	0.034266	0.00132515	2.70877	down	NM_203436	NM_203436	NM_203436	Hs.149910	121549	ASCL4	achaete-scute family bHLH transcription factor 4	ENST00000342331	THC2485888	GO:0003677(DNA binding)|GO:0005575(cellular_component)|GO:0005634(nucleus)|GO:0006351(transcription, DNA-dependent)|GO:0006357(regulation of transcription from RNA polymerase II promoter)|GO:0043588(skin development)|GO:0046983(protein dimerization activity)	Homo sapiens achaete-scute family bHLH transcription factor 4 (ASCL4), mRNA [NM_203436]	chr12:108170247-108170306	hs|12q23.3	AGAGCCCAGATTTGTATGAAAACTTGTTTTTCCTCTCAATTGTTTTGTCCACTGTTTTCT	TRUE
cg25763393	0.000420369	0.0159922	0.251167	0.417833	0.166667	37	19	52956832	TGGGGCGTGAACTCGCAAGCGCAGTTTCCTGAAGACCCGGAAGCCGATCG	19	57648644	ZNF578	NM_001099694;NM_001099694	1stExon	Island	A_33_P3345132	0.0302229	0.000674453	2.53956	down	NM_001099694	NM_001099694	NM_001099694	Hs.157287	147660	ZNF578	zinc finger protein 578		THC2742978	GO:0003677(DNA binding)|GO:0005634(nucleus)|GO:0005737(cytoplasm)|GO:0006351(transcription, DNA-dependent)|GO:0006355(regulation of transcription, DNA-dependent)|GO:0046872(metal ion binding)	Homo sapiens zinc finger protein 578 (ZNF578), mRNA [NM_001099694]	chr19:53019319-53019378	hs|19q13.41	AGTCACATTTGCTTTTCTCTTTTCCCAAACATCAAAACCCTTCCTGTCTCAGGTCATTGT	TRUE
cg10778841	5.8e-05	0.00893318	0.231833	0.375167	0.143333	37	10	106401319	GGCAGTGGCCAGCCAGTGGCCGGAGGAGCTGGCGTCGGCGCGGAGAGCCG	10	106391309	SORCS3	NM_014978	1stExon	Island	A_33_P3371633	0.0459609	0.00345619	2.64066	down	NM_014978	NM_014978	NM_014978	Hs.671950	22986	SORCS3	sortilin-related VPS10 domain containing receptor 3	ENST00000369701	THC2476655	GO:0007218(neuropeptide signaling pathway)|GO:0007612(learning)|GO:0007613(memory)|GO:0008188(neuropeptide receptor activity)|GO:0016020(membrane)|GO:0016021(integral to membrane)|GO:1900452(regulation of long term synaptic depression)	Homo sapiens sortilin-related VPS10 domain containing receptor 3 (SORCS3), mRNA [NM_014978]	chr10:107023073-107023132	hs|10q25.1	ATTGCCACTATTGCAAACAGCGAAAGCACAAAGGAGATCCCCAACTGCACTAGTGTTTAA	TRUE
cg23416081	0.00032443	0.0147161	0.297833	0.527667	0.229833	37	6	35693573	CCCCATTTTAGTGCTCACAGCTCTCAAAAAGGCTGGTACAGTTTGTTACG	6	35801551	FKBP5	NM_001145775	5'UTR	N_Shelf	A_21_P0000010	0.048567	0.00404957	3.25497	down	NM_001145777	NM_001145777	NM_001145777	Hs.407190	2289	FKBP5	FK506 binding protein 5	ENST00000542713		GO:0000413(protein peptidyl-prolyl isomerization)|GO:0003755(peptidyl-prolyl cis-trans isomerase activity)|GO:0005515(protein binding)|GO:0005528(FK506 binding)|GO:0005654(nucleoplasm)|GO:0005789(endoplasmic reticulum membrane)|GO:0006457(protein folding)|GO:0016020(membrane)|GO:0031072(heat shock protein binding)|GO:0061077(chaperone-mediated protein folding)|GO:0070062(extracellular vesicular e…	Homo sapiens FK506 binding protein 5 (FKBP5), transcript variant 4, mRNA [NM_001145777]	chr6:35548734-35548675	hs|6p21.31	CACTTGCCAGAATGTAATATTTGCTGTGAAGTGCTGAAAAGAAAAGTAACTTCCTTTTCA	TRUE
cg18267381	1.3e-05	0.0068514	0.215	0.3805	0.1655	37	3	21792434	GCTCTGCTCTACGTGCCAGCCTTGGGTGAGAGCTGATGCTGAAGACACCG	3	21767438	ZNF385D	NM_024697;NM_024697	5'UTR		A_21_P0013971	0.0401562	0.00235067	2.52957	down	ENST00000497570		BX104753	Hs.742358	79750	ZNF385D	zinc finger protein 385D	ENST00000497570	THC2699452	GO:0003676(nucleic acid binding)|GO:0005634(nucleus)|GO:0008270(zinc ion binding)	zinc finger protein 385D [Source:HGNC Symbol;Acc:HGNC:26191] [ENST00000497570]	chr3:22175335-22175276	hs|3p24.3	GCAATTTCCACAGATGCTTTGTTTGTGGAGAAAAGTAGGATGGCCCCTCTGCTTGTCTTA	TRUE
cg04947157	0.000192999	0.0124274	-0.286	0.316667	0.602667	37	17	76128481	AAGCTTGCGGTGAGCAGCAGGCTCAGCAGGTTGAGTAGCAGCAGGAAGCG	17	73640076	TMC6	NM_152468;NM_007267;NM_007267	5'UTR	S_Shore	A_23_P101013	0.0310303	0.000790117	5.05428	up	NM_007267	NM_007267	NM_007267	Hs.632227	11322	TMC6	transmembrane channel-like 6	ENST00000591436	THC2751094	GO:0005515(protein binding)|GO:0005737(cytoplasm)|GO:0005783(endoplasmic reticulum)|GO:0005789(endoplasmic reticulum membrane)|GO:0005794(Golgi apparatus)|GO:0006811(ion transport)|GO:0008150(biological_process)|GO:0016021(integral to membrane)|GO:0031965(nuclear membrane)|GO:0070062(extracellular vesicular exosome)	Homo sapiens transmembrane channel-like 6 (TMC6), transcript variant 2, mRNA [NM_007267]	chr17:76113361-76109658	hs|17q25.3	CAGATCAGCAATGAGGGTGAGGACAAAATCTTCTTAATCAACAAGCTTCACTCCATCTAC	TRUE
cg06643271	5.55e-05	0.00882969	-0.243333	0.202833	0.446167	37	17	76128170	CGGAAAAAGGAGAGTGGCATCATCCCACCTGCCTTCACCCGGGTCCCCCG	17	73639765	TMC6	NM_152468;NM_007267	5'UTR	Island	A_23_P101013	0.0310303	0.000790117	5.05428	up	NM_007267	NM_007267	NM_007267	Hs.632227	11322	TMC6	transmembrane channel-like 6	ENST00000591436	THC2751094	GO:0005515(protein binding)|GO:0005737(cytoplasm)|GO:0005783(endoplasmic reticulum)|GO:0005789(endoplasmic reticulum membrane)|GO:0005794(Golgi apparatus)|GO:0006811(ion transport)|GO:0008150(biological_process)|GO:0016021(integral to membrane)|GO:0031965(nuclear membrane)|GO:0070062(extracellular vesicular exosome)	Homo sapiens transmembrane channel-like 6 (TMC6), transcript variant 2, mRNA [NM_007267]	chr17:76113361-76109658	hs|17q25.3	CAGATCAGCAATGAGGGTGAGGACAAAATCTTCTTAATCAACAAGCTTCACTCCATCTAC	TRUE
cg25849281	8.92e-06	0.00647865	-0.256	0.289833	0.545833	37	1	8937077	CGCGCTCTTTCGCCCAGGCTAGAGTGCAGTGACACGATCTCGACTCACTG	1	8859664	ENO1	NM_001428	5'UTR	N_Shore	A_23_P137391	0.0493412	0.00420977	2.12666	up	NM_001428	NM_001428	NM_001428	Hs.517145	2023	ENO1	enolase 1, (alpha)	ENST00000464920	NP1194921	GO:0000015(phosphopyruvate hydratase complex)|GO:0000122(negative regulation of transcription from RNA polymerase II promoter)|GO:0000287(magnesium ion binding)|GO:0003677(DNA binding)|GO:0003700(sequence-specific DNA binding transcription factor activity)|GO:0003714(transcription corepressor activity)|GO:0004634(phosphopyruvate hydratase activity)|GO:0005515(protein binding)|GO:0005615(extracell…	Homo sapiens enolase 1, (alpha) (ENO1), transcript variant 1, mRNA [NM_001428]	chr1:8924113-8924054	hs|1p36.23	GGAGCTTGGCAGAAGTTCACAGCCAGTGCAGGAATCCAGGTAGTGGGGGATGATCTCACA	TRUE
cg06972019	3.3e-05	0.00774952	-0.228	0.173833	0.401833	37	1	8937448	CCCTAATTCGGGGTTCCATCCAGGCAGCTAAAAAAGCTGTGAATGGTCCG	1	8860035	ENO1	NM_001428	5'UTR	N_Shore	A_23_P137391	0.0493412	0.00420977	2.12666	up	NM_001428	NM_001428	NM_001428	Hs.517145	2023	ENO1	enolase 1, (alpha)	ENST00000464920	NP1194921	GO:0000015(phosphopyruvate hydratase complex)|GO:0000122(negative regulation of transcription from RNA polymerase II promoter)|GO:0000287(magnesium ion binding)|GO:0003677(DNA binding)|GO:0003700(sequence-specific DNA binding transcription factor activity)|GO:0003714(transcription corepressor activity)|GO:0004634(phosphopyruvate hydratase activity)|GO:0005515(protein binding)|GO:0005615(extracell…	Homo sapiens enolase 1, (alpha) (ENO1), transcript variant 1, mRNA [NM_001428]	chr1:8924113-8924054	hs|1p36.23	GGAGCTTGGCAGAAGTTCACAGCCAGTGCAGGAATCCAGGTAGTGGGGGATGATCTCACA	TRUE
cg24266651	0.00104722	0.022441	0.223667	0.754333	0.530667	37	11	7506655	CCTTTTTACTTTTGCTTTCCTCCTCCCTAGTGGATTCTGCAGTCCAATCG	11	7463231	OLFML1	NM_198474;NM_198474	5'UTR		A_23_P147665	0.030849	0.000761226	3.14119	down	NM_198474	NM_198474	NM_198474	Hs.503500	283298	OLFML1	olfactomedin-like 1	ENST00000329293	THC2470509	GO:0005576(extracellular region)	Homo sapiens olfactomedin-like 1 (OLFML1), mRNA [NM_198474]	chr11:7531816-7531875	hs|11p15.4	GCTGAAGCTCTTCCCTCTTTTTCAAATGTCTATTGATATTCTCCCATTTTCACTGCCCAA	TRUE
cg19370054	0.001093	0.0228396	0.243333	0.342333	0.099	37	2	98964186	CGCTCCCCATCACATCTTCCAAAGGGGCGAGGCTGGGATCAGCAGGAATG	2	98330618	CNGA3	NM_001298;NM_001079878	5'UTR	Island	A_23_P68167	0.0345202	0.00136329	2.47184	down	NM_001298	NM_001298	NM_001298	Hs.234785	1261	CNGA3	cyclic nucleotide gated channel alpha 3	ENST00000393504	THC2481839	GO:0005222(intracellular cAMP activated cation channel activity)|GO:0005223(intracellular cGMP activated cation channel activity)|GO:0005249(voltage-gated potassium channel activity)|GO:0005737(cytoplasm)|GO:0005887(integral to plasma membrane)|GO:0006810(transport)|GO:0006812(cation transport)|GO:0007165(signal transduction)|GO:0007601(visual perception)|GO:0007603(phototransduction, visible lig…	Homo sapiens cyclic nucleotide gated channel alpha 3 (CNGA3), transcript variant 1, mRNA [NM_001298]	chr2:99014994-99015053	hs|2q11.2	AAAGCCTTAACTGTTAGTTATGCCTGCATTCATATTTGCACAGGAAAAATAAAGACCTGG	TRUE
cg19370054	0.001093	0.0228396	0.243333	0.342333	0.099	37	2	98964186	CGCTCCCCATCACATCTTCCAAAGGGGCGAGGCTGGGATCAGCAGGAATG	2	98330618	CNGA3	NM_001298;NM_001079878	5'UTR	Island	A_23_P68167	0.0345202	0.00136329	2.47184	down	NM_001298	NM_001298	NM_001298	Hs.234785	1261	CNGA3	cyclic nucleotide gated channel alpha 3	ENST00000393504	THC2481839	GO:0005222(intracellular cAMP activated cation channel activity)|GO:0005223(intracellular cGMP activated cation channel activity)|GO:0005249(voltage-gated potassium channel activity)|GO:0005737(cytoplasm)|GO:0005887(integral to plasma membrane)|GO:0006810(transport)|GO:0006812(cation transport)|GO:0007165(signal transduction)|GO:0007601(visual perception)|GO:0007603(phototransduction, visible lig…	Homo sapiens cyclic nucleotide gated channel alpha 3 (CNGA3), transcript variant 1, mRNA [NM_001298]	chr2:99014994-99015053	hs|2q11.2	AAAGCCTTAACTGTTAGTTATGCCTGCATTCATATTTGCACAGGAAAAATAAAGACCTGG	TRUE
cg13499324	0.000499596	0.017021	-0.236167	0.667833	0.904	37	9	3441530	CGGGCATCTTGTAGTATCAAAAAATAAAATGTGCTCAACAAAAAAGGTGG	9	3431530	RFX3	NM_002919;NM_134428	5'UTR		A_23_P9289	0.0459203	0.00344909	3.00891	up	NM_134428	NM_134428	NM_134428	Hs.136829	5991	RFX3	regulatory factor X, 3 (influences HLA class II expression)	ENST00000458034	THC2787254	GO:0000790(nuclear chromatin)|GO:0000978(RNA polymerase II core promoter proximal region sequence-specific DNA binding)|GO:0003309(type B pancreatic cell differentiation)|GO:0003677(DNA binding)|GO:0003700(sequence-specific DNA binding transcription factor activity)|GO:0003705(RNA polymerase II distal enhancer sequence-specific DNA binding transcription factor activity)|GO:0005515(protein binding…	Homo sapiens regulatory factor X, 3 (influences HLA class II expression) (RFX3), transcript variant 2, mRNA [NM_134428]	chr9:3257191-3257132	hs|9p24.2	TTCCTGGGTGTGCCAGTGTGATGACAACATGGTTCAGAGACTAGAAACAGACTTCAAGAT	TRUE
cg13499324	0.000499596	0.017021	-0.236167	0.667833	0.904	37	9	3441530	CGGGCATCTTGTAGTATCAAAAAATAAAATGTGCTCAACAAAAAAGGTGG	9	3431530	RFX3	NM_002919;NM_134428	5'UTR		A_23_P9289	0.0459203	0.00344909	3.00891	up	NM_134428	NM_134428	NM_134428	Hs.136829	5991	RFX3	regulatory factor X, 3 (influences HLA class II expression)	ENST00000458034	THC2787254	GO:0000790(nuclear chromatin)|GO:0000978(RNA polymerase II core promoter proximal region sequence-specific DNA binding)|GO:0003309(type B pancreatic cell differentiation)|GO:0003677(DNA binding)|GO:0003700(sequence-specific DNA binding transcription factor activity)|GO:0003705(RNA polymerase II distal enhancer sequence-specific DNA binding transcription factor activity)|GO:0005515(protein binding…	Homo sapiens regulatory factor X, 3 (influences HLA class II expression) (RFX3), transcript variant 2, mRNA [NM_134428]	chr9:3257191-3257132	hs|9p24.2	TTCCTGGGTGTGCCAGTGTGATGACAACATGGTTCAGAGACTAGAAACAGACTTCAAGAT	TRUE
cg10278102	0.000164662	0.0119244	-0.2615	0.363333	0.624833	37	11	20410216	AAAAGTCCTACTTAAGTAAGGTGAACTTCCTTCTTAGACTATGGAAACCG	11	20366792	PRMT3	NM_001145167;NM_001145166;NM_005788	5'UTR	S_Shore	A_23_P9894	0.0494794	0.00423822	2.09169	up	NM_005788	NM_005788	NM_005788	Hs.152337	10196	PRMT3	protein arginine methyltransferase 3	ENST00000437750	THC2464371	GO:0005515(protein binding)|GO:0005737(cytoplasm)|GO:0005829(cytosol)|GO:0005840(ribosome)|GO:0006355(regulation of transcription, DNA-dependent)|GO:0008168(methyltransferase activity)|GO:0008469(histone-arginine N-methyltransferase activity)|GO:0016274(protein-arginine N-methyltransferase activity)|GO:0019919(peptidyl-arginine methylation, to asymmetrical-dimethyl arginine)|GO:0031397(negative r…	Homo sapiens protein arginine methyltransferase 3 (PRMT3), transcript variant 1, mRNA [NM_005788]	chr11:20529950-20530009	hs|11p15.1	TCTCCAGTGAAACAGCCATAAAAGCACACTACCTTGTAGTTTTTAATGTGGGGGTAGAGT	TRUE
cg15085086	0.00084444	0.0206666	0.201167	0.480167	0.279	37	6	154360894	GTTTCCGAAGAGCCCCACCACGCACACGATGGAGTAGAGGGCCATGATCG	6	154402587	OPRM1	NM_001145286;NM_001145282;NM_001145281;NM_001145283;NM_001008505;NM_001145285;NM_001008503;NM_001145284;NM_001145280;NM_001008504;NM_001145279;NM_000914	5'UTR	Island	A_24_P397613	0.0258475	0.000256388	3.19877	down	NM_001008504	NM_001008504	NM_001008504	Hs.2353	4988	OPRM1	opioid receptor, mu 1	ENST00000519613	NP1455637	GO:0001965(G-protein alpha-subunit binding)|GO:0002438(acute inflammatory response to antigenic stimulus)|GO:0004930(G-protein coupled receptor activity)|GO:0004979(beta-endorphin receptor activity)|GO:0005245(voltage-gated calcium channel activity)|GO:0005515(protein binding)|GO:0005783(endoplasmic reticulum)|GO:0005794(Golgi apparatus)|GO:0005886(plasma membrane)|GO:0005887(integral to plasma m…	Homo sapiens opioid receptor, mu 1 (OPRM1), transcript variant MOR-1A, mRNA [NM_001008504]	chr6:154412328-154412387	hs|6q25.2	GACTCCCATTCACATTTACGTCATCATTAAAGCCTTGGTTACAATCCCAGAAACTACGTT	TRUE
cg00939495	0.000727016	0.0195707	0.216	0.489167	0.273167	37	4	9783398	GGTGCGCCCCTCCAGTCTCCGCGATGGGGACAGGAAGCGGCTGGTGCTCG	4	9392496	DRD5	NM_000798;NM_000798	5'UTR	Island	A_24_P862886	0.0341166	0.00129144	3.19041	down	NM_000798	NM_000798	NM_000798	Hs.380681	1816	DRD5	dopamine receptor D5	ENST00000421395	NP511193	GO:0001588(dopamine receptor activity, coupled via Gs)|GO:0001963(synaptic transmission, dopaminergic)|GO:0001975(response to amphetamine)|GO:0001992(regulation of systemic arterial blood pressure by vasopressin)|GO:0001994(norepinephrine-epinephrine vasoconstriction involved in regulation of systemic arterial blood pressure)|GO:0004952(dopamine receptor activity)|GO:0005886(plasma membrane)|GO:0…	Homo sapiens dopamine receptor D5 (DRD5), mRNA [NM_000798]	chr4:9784811-9784870	hs|4p16.1	GGTGAACATCAGCAATGAGCTCATCTCCTACAACCAAGACATGGTCTTCCACAAGGAAAT	TRUE
cg13562542	8.59e-05	0.0099045	0.215167	0.296833	0.0816667	37	3	71803339	GCCAGGCACAGGTCGAGCAGCAGGTAGTACGGGGCGCGGTGCAGGCTGCG	3	71886029	EIF4E3	NM_018971;NM_173359;NM_001134649	5'UTR	Island	A_24_P943113	0.0361037	0.00168679	2.73538	down	NM_173359	NM_173359	NM_173359	Hs.581355	317649	EIF4E3	eukaryotic translation initiation factor 4E family member 3	ENST00000295612	THC2471711	GO:0003743(translation initiation factor activity)|GO:0005829(cytosol)|GO:0005845(mRNA cap binding complex)|GO:0006413(translational initiation)|GO:0006417(regulation of translation)|GO:0019221(cytokine-mediated signaling pathway)	Homo sapiens eukaryotic translation initiation factor 4E family member 3 (EIF4E3), transcript variant 2, mRNA [NM_173359]	chr3:71732228-71732169	hs|3p13	CCTTAGTGATTTCAAAATGAAGTATAAGAATATCAGATCCAGTTAGCAAAAGCCTAGGAC	TRUE
cg13562542	8.59e-05	0.0099045	0.215167	0.296833	0.0816667	37	3	71803339	GCCAGGCACAGGTCGAGCAGCAGGTAGTACGGGGCGCGGTGCAGGCTGCG	3	71886029	EIF4E3	NM_018971;NM_173359;NM_001134649	5'UTR	Island	A_24_P943113	0.0361037	0.00168679	2.73538	down	NM_173359	NM_173359	NM_173359	Hs.581355	317649	EIF4E3	eukaryotic translation initiation factor 4E family member 3	ENST00000295612	THC2471711	GO:0003743(translation initiation factor activity)|GO:0005829(cytosol)|GO:0005845(mRNA cap binding complex)|GO:0006413(translational initiation)|GO:0006417(regulation of translation)|GO:0019221(cytokine-mediated signaling pathway)	Homo sapiens eukaryotic translation initiation factor 4E family member 3 (EIF4E3), transcript variant 2, mRNA [NM_173359]	chr3:71732228-71732169	hs|3p13	CCTTAGTGATTTCAAAATGAAGTATAAGAATATCAGATCCAGTTAGCAAAAGCCTAGGAC	TRUE
cg15665400	2.52e-05	0.007461	-0.215167	0.173667	0.388833	37	2	133428652	AGCAGCCAGAGGCCGAGTCCGAGGCTGGGATGGCCTTTCAGGAGAGGACG	2	133145122	LYPD1	NM_144586;NM_001077427	5'UTR	Island	A_32_P101031	0.0461332	0.00349044	2.29859	up	NM_144586	NM_144586	NM_144586	Hs.432395	116372	LYPD1	LY6/PLAUR domain containing 1	ENST00000397463	THC2466997	GO:0005886(plasma membrane)|GO:0031225(anchored to membrane)	Homo sapiens LY6/PLAUR domain containing 1 (LYPD1), transcript variant 1, mRNA [NM_144586]	chr2:133402490-133402431	hs|2q21.2	CACTGTTTCAAACCCGGGGGAGTTGGCTGTGTTAAAGAAAGACCATTAAATGCTTTAGAC	TRUE
cg12581592	0.00348399	0.0380868	0.207	0.346167	0.139167	37	11	13984043	CGCCTAGGAGGCTGCTGCTCCAACCCCCAGCTACACTCCGGACCCTCTGG	11	13940619	SPON1	NM_006108;NM_006108	5'UTR	N_Shore	A_32_P133072	0.0296854	0.000614028	3.70236	down	NM_006108	NM_006108	NM_006108	Hs.643864	10418	SPON1	spondin 1, extracellular matrix protein	ENST00000576479	THC2468743	GO:0005515(protein binding)|GO:0005578(proteinaceous extracellular matrix)|GO:0005615(extracellular space)|GO:0005788(endoplasmic reticulum lumen)|GO:0006493(protein O-linked glycosylation)|GO:0007155(cell adhesion)|GO:0031012(extracellular matrix)|GO:0036066(protein O-linked fucosylation)|GO:0043687(post-translational protein modification)|GO:0044267(cellular protein metabolic process)	Homo sapiens spondin 1, extracellular matrix protein (SPON1), mRNA [NM_006108]	chr11:14289180-14289239	hs|11p15.2	ACCAGGTTAATGGCTAAGAATGGGTAACATGACTCTTGTTGGATTGTTATTTTTTGTTTG	TRUE
cg20693209	0.00124727	0.0241119	0.218833	0.406333	0.1875	37	11	13984067	CGGACCCTGTGGGCTCTGTCCCATCGCCTAGGAGGCTGCTGCTCCAACCC	11	13940643	SPON1	NM_006108;NM_006108	5'UTR	Island	A_32_P133072	0.0296854	0.000614028	3.70236	down	NM_006108	NM_006108	NM_006108	Hs.643864	10418	SPON1	spondin 1, extracellular matrix protein	ENST00000576479	THC2468743	GO:0005515(protein binding)|GO:0005578(proteinaceous extracellular matrix)|GO:0005615(extracellular space)|GO:0005788(endoplasmic reticulum lumen)|GO:0006493(protein O-linked glycosylation)|GO:0007155(cell adhesion)|GO:0031012(extracellular matrix)|GO:0036066(protein O-linked fucosylation)|GO:0043687(post-translational protein modification)|GO:0044267(cellular protein metabolic process)	Homo sapiens spondin 1, extracellular matrix protein (SPON1), mRNA [NM_006108]	chr11:14289180-14289239	hs|11p15.2	ACCAGGTTAATGGCTAAGAATGGGTAACATGACTCTTGTTGGATTGTTATTTTTTGTTTG	TRUE
cg24243629	0.000823387	0.020486	0.243167	0.643833	0.400667	37	18	56532628	CGTTCTAGGAAATGAACATAAATGCATTCCAGTGATGCTGTTAGCCATAC	18	54683608	ZNF532	NM_018181	5'UTR	S_Shore	A_33_P3214199	0.043151	0.00287853	2.42948	down	NM_018181	NM_018181	NM_018181	Hs.529023	55205	ZNF532	zinc finger protein 532	ENST00000591083	THC2512007	GO:0003677(DNA binding)|GO:0005634(nucleus)|GO:0006351(transcription, DNA-dependent)|GO:0006355(regulation of transcription, DNA-dependent)|GO:0046872(metal ion binding)	Homo sapiens zinc finger protein 532 (ZNF532), mRNA [NM_018181]	chr18:56652368-56652427	hs|18q21.32	ATAAGGAATGCTGATTTCCTCAATTCCATTTTGAGGAATGGGGAAGGCTATTCTAAAGAA	TRUE
cg03078169	0.000596921	0.0182316	0.220333	0.655833	0.4355	37	19	35629791	CGGGCTGTCCCCTGCTGAAAGAAGGCCCCCAAACGTCCTGCTGTGCCCCG	19	40321631	FXYD1	NM_021902;NM_021902;NM_005031	5'UTR	N_Shelf	A_33_P3228435	0.0254975	0.000205004	4.02531	down	NM_001278717	NM_001278717	NM_001278717	Hs.442498	5348	FXYD1	FXYD domain containing ion transport regulator 1	ENST00000587056	THC2471806	GO:0005254(chloride channel activity)|GO:0005886(plasma membrane)|GO:0005887(integral to plasma membrane)|GO:0005890(sodium:potassium-exchanging ATPase complex)|GO:0006821(chloride transport)|GO:0006874(cellular calcium ion homeostasis)|GO:0006936(muscle contraction)|GO:0008016(regulation of heart contraction)|GO:0017080(sodium channel regulator activity)|GO:0034220(ion transmembrane transport)|G…	Homo sapiens FXYD domain containing ion transport regulator 1 (FXYD1), transcript variant c, mRNA [NM_001278717]	chr19:35630984-35631043	hs|19q13.12	ATGGCGTCTCTTGGCCACATCTTGGTTTTCTGTGTGGGTCTCCTCACCATGGCCAAGGCA	TRUE
cg05508084	0.00373389	0.0394145	0.2635	0.463333	0.199833	37	19	56988398	CTTCGCTGCTGTGGTTCTCGGGGCTTGTGCGCCCAAGTGTGAAGTTGGCG	19	61680210	ZNF667	NM_022103;NR_030740	5'UTR	Island	A_33_P3231695	0.0364199	0.00173289	2.62275	down	NM_022103	NM_022103	NM_022103	Hs.676605	63934	ZNF667	zinc finger protein 667	ENST00000592189	THC2491798	GO:0003677(DNA binding)|GO:0003712(transcription cofactor activity)|GO:0005634(nucleus)|GO:0006351(transcription, DNA-dependent)|GO:0006357(regulation of transcription from RNA polymerase II promoter)|GO:0046872(metal ion binding)	Homo sapiens zinc finger protein 667 (ZNF667), transcript variant 1, mRNA [NM_022103]	chr19:56951398-56951339	hs|19q13.43	ATTAGGATTAGATGAGGTCATGAGGGTGGAGCCCTCGTGATGGGATTAGTGCCTTTATAA	TRUE
cg21604615	7.61e-06	0.00646045	-0.229833	0.230333	0.460167	37	1	27668610	GGCACCGACACGTGTTACCTGTAGGGGTCCAGTATGGGAGGACACCTTCG	1	27541197	SYTL1	NM_032872;NM_032872	5'UTR		A_33_P3235321	0.0250229	0.000107334	5.64922	up	NM_032872	NM_032872	NM_032872	Hs.469175	84958	SYTL1	synaptotagmin-like 1	ENST00000496001	THC2782501	GO:0005515(protein binding)|GO:0005886(plasma membrane)|GO:0006886(intracellular protein transport)|GO:0006887(exocytosis)|GO:0017137(Rab GTPase binding)|GO:0019897(extrinsic to plasma membrane)|GO:0042043(neurexin family protein binding)|GO:0042470(melanosome)|GO:0070062(extracellular vesicular exosome)	Homo sapiens synaptotagmin-like 1 (SYTL1), transcript variant 2, mRNA [NM_032872]	chr1:27676916-27676975	hs|1p36.11	CAAGCGCAAGACGGCGGTGAAGAAACGGAATCTGAATCCGGTTTTCAACGAGACTCTCCG	TRUE
cg04290586	0.0010674	0.0226253	0.221333	0.495667	0.274333	37	12	108168987	GTCTTCTTCTATTGAGAGATTGACCTCTTGAGTGATTTGTGTGCTTTCCG	12	106693117	ASCL4	NM_203436;NM_203436	5'UTR	Island	A_33_P3287303	0.034266	0.00132515	2.70877	down	NM_203436	NM_203436	NM_203436	Hs.149910	121549	ASCL4	achaete-scute family bHLH transcription factor 4	ENST00000342331	THC2485888	GO:0003677(DNA binding)|GO:0005575(cellular_component)|GO:0005634(nucleus)|GO:0006351(transcription, DNA-dependent)|GO:0006357(regulation of transcription from RNA polymerase II promoter)|GO:0043588(skin development)|GO:0046983(protein dimerization activity)	Homo sapiens achaete-scute family bHLH transcription factor 4 (ASCL4), mRNA [NM_203436]	chr12:108170247-108170306	hs|12q23.3	AGAGCCCAGATTTGTATGAAAACTTGTTTTTCCTCTCAATTGTTTTGTCCACTGTTTTCT	TRUE
cg25763393	0.000420369	0.0159922	0.251167	0.417833	0.166667	37	19	52956832	TGGGGCGTGAACTCGCAAGCGCAGTTTCCTGAAGACCCGGAAGCCGATCG	19	57648644	ZNF578	NM_001099694;NM_001099694	5'UTR	Island	A_33_P3345132	0.0302229	0.000674453	2.53956	down	NM_001099694	NM_001099694	NM_001099694	Hs.157287	147660	ZNF578	zinc finger protein 578		THC2742978	GO:0003677(DNA binding)|GO:0005634(nucleus)|GO:0005737(cytoplasm)|GO:0006351(transcription, DNA-dependent)|GO:0006355(regulation of transcription, DNA-dependent)|GO:0046872(metal ion binding)	Homo sapiens zinc finger protein 578 (ZNF578), mRNA [NM_001099694]	chr19:53019319-53019378	hs|19q13.41	AGTCACATTTGCTTTTCTCTTTTCCCAAACATCAAAACCCTTCCTGTCTCAGGTCATTGT	TRUE
cg06663317	0.00446375	0.0429772	0.219833	0.6135	0.393667	37	16	56641101	CGGAAAGCGCCAGGAGGGGAAAGAACAGGATGTTTACCAGCACCTTCCAC	16	55198602	MT2A	NM_005953	TSS1500	N_Shore	A_23_P106844	0.0271345	0.00034444	6.45042	down	NM_005953	NM_005953	NM_005953	Hs.534330	4502	MT2A	metallothionein 2A	ENST00000562017	THC2724128	GO:0005515(protein binding)|GO:0005634(nucleus)|GO:0005737(cytoplasm)|GO:0005829(cytosol)|GO:0006878(cellular copper ion homeostasis)|GO:0008144(drug binding)|GO:0008270(zinc ion binding)|GO:0019221(cytokine-mediated signaling pathway)|GO:0035690(cellular response to drug)|GO:0036016(cellular response to interleukin-3)|GO:0036018(cellular response to erythropoietin)|GO:0045926(negative regulation…	Homo sapiens metallothionein 2A (MT2A), mRNA [NM_005953]	chr16:56643332-56643391	hs|16q12.2	CAACCCTGACCGTGACCGTTTGCTATATTCCTTTTTCTATGAAATAATGTGAATGATAAT	TRUE
cg08409642	0.00417768	0.0415626	0.231	0.451333	0.220333	37	16	56641373	CGGGCCTTCCAAGGTTGACGATCTAAGGCCCTTACACAGCGCCAGACACG	16	55198874	MT2A	NM_005953	TSS1500	N_Shore	A_23_P106844	0.0271345	0.00034444	6.45042	down	NM_005953	NM_005953	NM_005953	Hs.534330	4502	MT2A	metallothionein 2A	ENST00000562017	THC2724128	GO:0005515(protein binding)|GO:0005634(nucleus)|GO:0005737(cytoplasm)|GO:0005829(cytosol)|GO:0006878(cellular copper ion homeostasis)|GO:0008144(drug binding)|GO:0008270(zinc ion binding)|GO:0019221(cytokine-mediated signaling pathway)|GO:0035690(cellular response to drug)|GO:0036016(cellular response to interleukin-3)|GO:0036018(cellular response to erythropoietin)|GO:0045926(negative regulation…	Homo sapiens metallothionein 2A (MT2A), mRNA [NM_005953]	chr16:56643332-56643391	hs|16q12.2	CAACCCTGACCGTGACCGTTTGCTATATTCCTTTTTCTATGAAATAATGTGAATGATAAT	TRUE
cg10318258	0.000625507	0.0185064	-0.2185	0.596	0.8145	37	14	24809759	AGTTATCCTGTTTTCACATAGGCTTCAGGGCTGTACCACTCAGCTGGTCG	14	23879599	RIPK3	NM_006871	TSS1500	S_Shore	A_23_P14559	0.0310083	0.000788199	6.29812	up	NM_006871	NM_006871	NM_006871	Hs.268551	11035	RIPK3	receptor-interacting serine-threonine kinase 3	ENST00000554756	NP1395163	GO:0001914(regulation of T cell mediated cytotoxicity)|GO:0002224(toll-like receptor signaling pathway)|GO:0002756(MyD88-independent toll-like receptor signaling pathway)|GO:0002819(regulation of adaptive immune response)|GO:0003713(transcription coactivator activity)|GO:0004672(protein kinase activity)|GO:0004674(protein serine/threonine kinase activity)|GO:0004704(NF-kappaB-inducing kinase acti…	Homo sapiens receptor-interacting serine-threonine kinase 3 (RIPK3), mRNA [NM_006871]	chr14:24806583-24806524	hs|14q12	TGGCTTTAGGAGAACCATAGAAAACCAGCACTCTCGTAATGATGTCATGGTTTCTGAGTG	TRUE
cg08189186	0.000445476	0.0163622	0.201	0.7465	0.5455	37	19	38793546	CCTTATAGAAAGGGACACAACATGAGATGATCTTGCTCTGGGCCATGCCG	19	43485386	C19orf33	NM_033520	TSS1500		A_23_P208788	0.0295433	0.000591897	3.30416	down	NM_033520	NM_033520	NM_033520	Hs.631544	64073	C19orf33	chromosome 19 open reading frame 33	ENST00000589986	THC2480610	GO:0003690(double-stranded DNA binding)|GO:0003697(single-stranded DNA binding)|GO:0005634(nucleus)|GO:0008150(biological_process)	Homo sapiens chromosome 19 open reading frame 33 (C19orf33), mRNA [NM_033520]	chr19:38795581-38795640	hs|19q13.2	AAGAAGAAGGAGGCTCCCCACTGAAGGGCCCTGGACAGGGCTCATTAAACCTTCCTCTCT	TRUE
cg00466249	0.00124294	0.0240717	-0.216333	0.475333	0.691667	37	17	79269884	CTGTGGATTCCTGGCACCTAGCTGCTCACTCTGAGTCTAATGAATGAGCG	17	76884479	SLC38A10	NM_138570;NM_001037984	TSS1500	S_Shore	A_23_P379630	0.0285545	0.000454074	3.77538	up	NM_138570	NM_138570	NM_138570	Hs.352240	124565	SLC38A10	solute carrier family 38, member 10	ENST00000288439	THC2464913	GO:0003333(amino acid transmembrane transport)|GO:0005794(Golgi apparatus)|GO:0006814(sodium ion transport)|GO:0015171(amino acid transmembrane transporter activity)|GO:0016021(integral to membrane)|GO:0060348(bone development)	Homo sapiens solute carrier family 38, member 10 (SLC38A10), transcript variant 2, mRNA [NM_138570]	chr17:79225124-79225065	hs|17q25.3	TCAGCAGCTTGCTTTCTGGGAACCTTTTATCTGCCTTACTCCCCTTTAAACACCTGCGGC	TRUE
cg00466249	0.00124294	0.0240717	-0.216333	0.475333	0.691667	37	17	79269884	CTGTGGATTCCTGGCACCTAGCTGCTCACTCTGAGTCTAATGAATGAGCG	17	76884479	SLC38A10	NM_138570;NM_001037984	TSS1500	S_Shore	A_23_P379630	0.0285545	0.000454074	3.77538	up	NM_138570	NM_138570	NM_138570	Hs.352240	124565	SLC38A10	solute carrier family 38, member 10	ENST00000288439	THC2464913	GO:0003333(amino acid transmembrane transport)|GO:0005794(Golgi apparatus)|GO:0006814(sodium ion transport)|GO:0015171(amino acid transmembrane transporter activity)|GO:0016021(integral to membrane)|GO:0060348(bone development)	Homo sapiens solute carrier family 38, member 10 (SLC38A10), transcript variant 2, mRNA [NM_138570]	chr17:79225124-79225065	hs|17q25.3	TCAGCAGCTTGCTTTCTGGGAACCTTTTATCTGCCTTACTCCCCTTTAAACACCTGCGGC	TRUE
cg12646820	0.000310652	0.0145007	0.207667	0.756833	0.549167	37	6	13924406	GACCAGTCCTTGGCACAGAGTCACTCAGGGCTCATGGTAGATGCTTAGCG	6	14032385	RNF182	NM_001165033;NM_152737;NM_001165034;NM_001165032	TSS1500	N_Shore	A_23_P399255	0.0339155	0.00125646	2.39039	down	NM_152737	NM_152737	NM_152737	Hs.111164	221687	RNF182	ring finger protein 182	ENST00000544682	THC2465063	GO:0004842(ubiquitin-protein ligase activity)|GO:0005515(protein binding)|GO:0005737(cytoplasm)|GO:0008270(zinc ion binding)|GO:0016021(integral to membrane)|GO:0016567(protein ubiquitination)|GO:0016874(ligase activity)	Homo sapiens ring finger protein 182 (RNF182), transcript variant 2, mRNA [NM_152737]	chr6:13979997-13980056	hs|6p23	TAGAAAGCTCTGGACATGGGTACGATGTGTTTTGCTTCTCTGTATAATGTCTACAGTGAT	TRUE
cg12646820	0.000310652	0.0145007	0.207667	0.756833	0.549167	37	6	13924406	GACCAGTCCTTGGCACAGAGTCACTCAGGGCTCATGGTAGATGCTTAGCG	6	14032385	RNF182	NM_001165033;NM_152737;NM_001165034;NM_001165032	TSS1500	N_Shore	A_23_P399255	0.0339155	0.00125646	2.39039	down	NM_152737	NM_152737	NM_152737	Hs.111164	221687	RNF182	ring finger protein 182	ENST00000544682	THC2465063	GO:0004842(ubiquitin-protein ligase activity)|GO:0005515(protein binding)|GO:0005737(cytoplasm)|GO:0008270(zinc ion binding)|GO:0016021(integral to membrane)|GO:0016567(protein ubiquitination)|GO:0016874(ligase activity)	Homo sapiens ring finger protein 182 (RNF182), transcript variant 2, mRNA [NM_152737]	chr6:13979997-13980056	hs|6p23	TAGAAAGCTCTGGACATGGGTACGATGTGTTTTGCTTCTCTGTATAATGTCTACAGTGAT	TRUE
cg12646820	0.000310652	0.0145007	0.207667	0.756833	0.549167	37	6	13924406	GACCAGTCCTTGGCACAGAGTCACTCAGGGCTCATGGTAGATGCTTAGCG	6	14032385	RNF182	NM_001165033;NM_152737;NM_001165034;NM_001165032	TSS1500	N_Shore	A_23_P399255	0.0339155	0.00125646	2.39039	down	NM_152737	NM_152737	NM_152737	Hs.111164	221687	RNF182	ring finger protein 182	ENST00000544682	THC2465063	GO:0004842(ubiquitin-protein ligase activity)|GO:0005515(protein binding)|GO:0005737(cytoplasm)|GO:0008270(zinc ion binding)|GO:0016021(integral to membrane)|GO:0016567(protein ubiquitination)|GO:0016874(ligase activity)	Homo sapiens ring finger protein 182 (RNF182), transcript variant 2, mRNA [NM_152737]	chr6:13979997-13980056	hs|6p23	TAGAAAGCTCTGGACATGGGTACGATGTGTTTTGCTTCTCTGTATAATGTCTACAGTGAT	TRUE
cg12646820	0.000310652	0.0145007	0.207667	0.756833	0.549167	37	6	13924406	GACCAGTCCTTGGCACAGAGTCACTCAGGGCTCATGGTAGATGCTTAGCG	6	14032385	RNF182	NM_001165033;NM_152737;NM_001165034;NM_001165032	TSS1500	N_Shore	A_23_P399255	0.0339155	0.00125646	2.39039	down	NM_152737	NM_152737	NM_152737	Hs.111164	221687	RNF182	ring finger protein 182	ENST00000544682	THC2465063	GO:0004842(ubiquitin-protein ligase activity)|GO:0005515(protein binding)|GO:0005737(cytoplasm)|GO:0008270(zinc ion binding)|GO:0016021(integral to membrane)|GO:0016567(protein ubiquitination)|GO:0016874(ligase activity)	Homo sapiens ring finger protein 182 (RNF182), transcript variant 2, mRNA [NM_152737]	chr6:13979997-13980056	hs|6p23	TAGAAAGCTCTGGACATGGGTACGATGTGTTTTGCTTCTCTGTATAATGTCTACAGTGAT	TRUE
cg25596287	0.000157189	0.0117471	-0.253833	0.494	0.747833	37	1	28843736	CGAGAAAACGTCCTTTGCAAGGGTTTCAGGGAACACCTGAAATCCTGAAG	1	28716323	RCC1	NR_030725;NM_001269;NR_030726;NM_001048195;NM_001048199;NM_001048194	TSS1500	N_Shore	A_23_P46309	0.0265471	0.000288673	4.47958	up	NM_001048199	NM_001048199	NM_001048199	Hs.469723	1104	RCC1	regulator of chromosome condensation 1	ENST00000373832	THC2461406	GO:0000082(G1/S transition of mitotic cell cycle)|GO:0000790(nuclear chromatin)|GO:0000794(condensed nuclear chromosome)|GO:0003682(chromatin binding)|GO:0005087(Ran guanyl-nucleotide exchange factor activity)|GO:0005515(protein binding)|GO:0005634(nucleus)|GO:0005654(nucleoplasm)|GO:0005737(cytoplasm)|GO:0007052(mitotic spindle organization)|GO:0007059(chromosome segregation)|GO:0007067(mitosis)…	Homo sapiens regulator of chromosome condensation 1 (RCC1), transcript variant 4, mRNA [NM_001048199]	chr1:28865048-28865107	hs|1p35.3	GCCAAATATTTGGCTCAGAACAGGTGTCCATGGGACAAAAAAGAACGATCCTCCACTTGA	TRUE
cg25596287	0.000157189	0.0117471	-0.253833	0.494	0.747833	37	1	28843736	CGAGAAAACGTCCTTTGCAAGGGTTTCAGGGAACACCTGAAATCCTGAAG	1	28716323	RCC1	NR_030725;NM_001269;NR_030726;NM_001048195;NM_001048199;NM_001048194	TSS1500	N_Shore	A_23_P46309	0.0265471	0.000288673	4.47958	up	NM_001048199	NM_001048199	NM_001048199	Hs.469723	1104	RCC1	regulator of chromosome condensation 1	ENST00000373832	THC2461406	GO:0000082(G1/S transition of mitotic cell cycle)|GO:0000790(nuclear chromatin)|GO:0000794(condensed nuclear chromosome)|GO:0003682(chromatin binding)|GO:0005087(Ran guanyl-nucleotide exchange factor activity)|GO:0005515(protein binding)|GO:0005634(nucleus)|GO:0005654(nucleoplasm)|GO:0005737(cytoplasm)|GO:0007052(mitotic spindle organization)|GO:0007059(chromosome segregation)|GO:0007067(mitosis)…	Homo sapiens regulator of chromosome condensation 1 (RCC1), transcript variant 4, mRNA [NM_001048199]	chr1:28865048-28865107	hs|1p35.3	GCCAAATATTTGGCTCAGAACAGGTGTCCATGGGACAAAAAAGAACGATCCTCCACTTGA	TRUE
cg25596287	0.000157189	0.0117471	-0.253833	0.494	0.747833	37	1	28843736	CGAGAAAACGTCCTTTGCAAGGGTTTCAGGGAACACCTGAAATCCTGAAG	1	28716323	RCC1	NR_030725;NM_001269;NR_030726;NM_001048195;NM_001048199;NM_001048194	TSS1500	N_Shore	A_23_P46309	0.0265471	0.000288673	4.47958	up	NM_001048199	NM_001048199	NM_001048199	Hs.469723	1104	RCC1	regulator of chromosome condensation 1	ENST00000373832	THC2461406	GO:0000082(G1/S transition of mitotic cell cycle)|GO:0000790(nuclear chromatin)|GO:0000794(condensed nuclear chromosome)|GO:0003682(chromatin binding)|GO:0005087(Ran guanyl-nucleotide exchange factor activity)|GO:0005515(protein binding)|GO:0005634(nucleus)|GO:0005654(nucleoplasm)|GO:0005737(cytoplasm)|GO:0007052(mitotic spindle organization)|GO:0007059(chromosome segregation)|GO:0007067(mitosis)…	Homo sapiens regulator of chromosome condensation 1 (RCC1), transcript variant 4, mRNA [NM_001048199]	chr1:28865048-28865107	hs|1p35.3	GCCAAATATTTGGCTCAGAACAGGTGTCCATGGGACAAAAAAGAACGATCCTCCACTTGA	TRUE
cg19409133	0.000159653	0.0117908	-0.2375	0.453833	0.691333	37	1	28843744	CGTCCTTTGCAAGGGTTTCAGGGAACACCTGAAATCCTGAAGAACTGTTT	1	28716331	RCC1	NR_030725;NM_001269;NR_030726;NM_001048195;NM_001048199;NM_001048194	TSS1500	N_Shore	A_23_P46309	0.0265471	0.000288673	4.47958	up	NM_001048199	NM_001048199	NM_001048199	Hs.469723	1104	RCC1	regulator of chromosome condensation 1	ENST00000373832	THC2461406	GO:0000082(G1/S transition of mitotic cell cycle)|GO:0000790(nuclear chromatin)|GO:0000794(condensed nuclear chromosome)|GO:0003682(chromatin binding)|GO:0005087(Ran guanyl-nucleotide exchange factor activity)|GO:0005515(protein binding)|GO:0005634(nucleus)|GO:0005654(nucleoplasm)|GO:0005737(cytoplasm)|GO:0007052(mitotic spindle organization)|GO:0007059(chromosome segregation)|GO:0007067(mitosis)…	Homo sapiens regulator of chromosome condensation 1 (RCC1), transcript variant 4, mRNA [NM_001048199]	chr1:28865048-28865107	hs|1p35.3	GCCAAATATTTGGCTCAGAACAGGTGTCCATGGGACAAAAAAGAACGATCCTCCACTTGA	TRUE
cg19409133	0.000159653	0.0117908	-0.2375	0.453833	0.691333	37	1	28843744	CGTCCTTTGCAAGGGTTTCAGGGAACACCTGAAATCCTGAAGAACTGTTT	1	28716331	RCC1	NR_030725;NM_001269;NR_030726;NM_001048195;NM_001048199;NM_001048194	TSS1500	N_Shore	A_23_P46309	0.0265471	0.000288673	4.47958	up	NM_001048199	NM_001048199	NM_001048199	Hs.469723	1104	RCC1	regulator of chromosome condensation 1	ENST00000373832	THC2461406	GO:0000082(G1/S transition of mitotic cell cycle)|GO:0000790(nuclear chromatin)|GO:0000794(condensed nuclear chromosome)|GO:0003682(chromatin binding)|GO:0005087(Ran guanyl-nucleotide exchange factor activity)|GO:0005515(protein binding)|GO:0005634(nucleus)|GO:0005654(nucleoplasm)|GO:0005737(cytoplasm)|GO:0007052(mitotic spindle organization)|GO:0007059(chromosome segregation)|GO:0007067(mitosis)…	Homo sapiens regulator of chromosome condensation 1 (RCC1), transcript variant 4, mRNA [NM_001048199]	chr1:28865048-28865107	hs|1p35.3	GCCAAATATTTGGCTCAGAACAGGTGTCCATGGGACAAAAAAGAACGATCCTCCACTTGA	TRUE
cg19409133	0.000159653	0.0117908	-0.2375	0.453833	0.691333	37	1	28843744	CGTCCTTTGCAAGGGTTTCAGGGAACACCTGAAATCCTGAAGAACTGTTT	1	28716331	RCC1	NR_030725;NM_001269;NR_030726;NM_001048195;NM_001048199;NM_001048194	TSS1500	N_Shore	A_23_P46309	0.0265471	0.000288673	4.47958	up	NM_001048199	NM_001048199	NM_001048199	Hs.469723	1104	RCC1	regulator of chromosome condensation 1	ENST00000373832	THC2461406	GO:0000082(G1/S transition of mitotic cell cycle)|GO:0000790(nuclear chromatin)|GO:0000794(condensed nuclear chromosome)|GO:0003682(chromatin binding)|GO:0005087(Ran guanyl-nucleotide exchange factor activity)|GO:0005515(protein binding)|GO:0005634(nucleus)|GO:0005654(nucleoplasm)|GO:0005737(cytoplasm)|GO:0007052(mitotic spindle organization)|GO:0007059(chromosome segregation)|GO:0007067(mitosis)…	Homo sapiens regulator of chromosome condensation 1 (RCC1), transcript variant 4, mRNA [NM_001048199]	chr1:28865048-28865107	hs|1p35.3	GCCAAATATTTGGCTCAGAACAGGTGTCCATGGGACAAAAAAGAACGATCCTCCACTTGA	TRUE
cg05667197	0.00507547	0.0458338	-0.248667	0.470667	0.719333	37	7	142828903	CGGGAAAAACTGGTGTATCTTTTGAGGTCCCAGCCATTTTGAGAAACTCT	7	142539025	PIP	NM_002652	TSS1500		A_23_P8702	0.0467443	0.00361632	2.79426	up	NM_002652	NM_002652	NM_002652	Hs.99949	5304	PIP	prolactin-induced protein	ENST00000291009	NP1157409	GO:0001580(detection of chemical stimulus involved in sensory perception of bitter taste)|GO:0001895(retina homeostasis)|GO:0001948(glycoprotein binding)|GO:0002682(regulation of immune system process)|GO:0003779(actin binding)|GO:0004190(aspartic-type endopeptidase activity)|GO:0005515(protein binding)|GO:0005615(extracellular space)|GO:0005634(nucleus)|GO:0006508(proteolysis)|GO:0010628(positiv…	Homo sapiens prolactin-induced protein (PIP), mRNA [NM_002652]	chr7:142836745-142836804	hs|7q34	TGTCTGTTTGCCACACCCAGGTGATTTCCTCTAAAGAAACTTGGCTGGAATTTCTGCTGT	TRUE
cg13588599	0.000932664	0.0214328	-0.220667	0.493667	0.714333	37	9	131102140	CCATGGTGTCTTGTGAGCAGCCTGGCACACCTGTTGGCACAAAGGACACG	9	130141961	SLC27A4	NM_005094	TSS1500	N_Shore	A_24_P257971	0.0258475	0.000262182	4.3626	up	NM_005094	NM_005094	NM_005094	Hs.656699	10999	SLC27A4	solute carrier family 27 (fatty acid transporter), member 4	ENST00000300456	THC2483022	GO:0000166(nucleotide binding)|GO:0001579(medium-chain fatty acid transport)|GO:0001676(long-chain fatty acid metabolic process)|GO:0004467(long-chain fatty acid-CoA ligase activity)|GO:0005789(endoplasmic reticulum membrane)|GO:0005886(plasma membrane)|GO:0005902(microvillus)|GO:0006629(lipid metabolic process)|GO:0006810(transport)|GO:0007584(response to nutrient)|GO:0015245(fatty acid transpor…	Homo sapiens solute carrier family 27 (fatty acid transporter), member 4 (SLC27A4), mRNA [NM_005094]	chr9:131122624-131122683	hs|9q34.11	TTCCAGAAGACAGAGCTACGGAAGGAGGGCTTTGACCCGGCTATTGTGAAAGACCCGCTG	TRUE
cg11065271	0.00315426	0.0363955	-0.206667	0.4415	0.648167	37	6	159070607	TAGCAGGGCAGGGACACTTCACGGTGCTGAGTAATACTACCTAGTACACG	6	158990595	SYTL3	NM_001009991	TSS1500		A_24_P291826	0.0250229	0.000160137	3.76488	up	NM_001009991	NM_001009991	NM_001009991	Hs.436977	94120	SYTL3	synaptotagmin-like 3	ENST00000297239	THC2486443	GO:0005544(calcium-dependent phospholipid binding)|GO:0006886(intracellular protein transport)|GO:0006887(exocytosis)|GO:0012505(endomembrane system)|GO:0017137(Rab GTPase binding)|GO:0019897(extrinsic to plasma membrane)|GO:0042043(neurexin family protein binding)	Homo sapiens synaptotagmin-like 3 (SYTL3), transcript variant 3, mRNA [NM_001009991]	chr6:159181680-159181739	hs|6q25.3	ATACGAAGACAGCGTTCCTCAGAGTAATGGAGAGCTCACAGTCCGGGCTAAGCTGGTTCT	TRUE
cg03432176	0.00316745	0.0364729	0.200833	0.495333	0.2945	37	2	160655066	TATTGACATTGTATATAACGCCAGTGCAGTGATCAAACACAGGGCACTCG	2	160363312	CD302	NM_014880	TSS1500	S_Shore	A_24_P396702	0.0306081	0.000726791	2.86873	down	NM_014880	NM_014880	NM_014880	Hs.130014	9936	CD302	CD302 molecule	ENST00000480212	THC2571448	GO:0005902(microvillus)|GO:0005938(cell cortex)|GO:0006909(phagocytosis)|GO:0016020(membrane)|GO:0016021(integral to membrane)|GO:0030175(filopodium)|GO:0030246(carbohydrate binding)	Homo sapiens CD302 molecule (CD302), transcript variant 1, mRNA [NM_014880]	chr2:160625659-160625600	hs|2q24.2	GCATTCTTGTAGTGAGCAGTGTATGGTCTCTTTTGTTCAGAATTTAAAACTGATAACCAA	TRUE
cg10038618	0.00359707	0.038671	0.228667	0.537833	0.309167	37	1	3567719	TTGGGTCTAGTTTTGGCAACAGAAAAGGCCGGCACCGCCGGAGTAGGACG	1	3557579	TP73	NM_005427;NM_017818	TSS1500	Island	A_24_P413470	0.0421498	0.00267477	3.89536	down	NM_005427	NM_005427	NM_005427	Hs.192132	7161	TP73	tumor protein p73	ENST00000603362	NP447234	GO:0000122(negative regulation of transcription from RNA polymerase II promoter)|GO:0000187(activation of MAPK activity)|GO:0000785(chromatin)|GO:0000978(RNA polymerase II core promoter proximal region sequence-specific DNA binding)|GO:0000981(sequence-specific DNA binding RNA polymerase II transcription factor activity)|GO:0001077(RNA polymerase II core promoter proximal region sequence-specific…	Homo sapiens tumor protein p73 (TP73), transcript variant 1, mRNA [NM_005427]	chr1:3649541-3649600	hs|1p36.32	CGGCGGCCCTGACGAGTGGGCGGACTTCGGCTTCGACCTGCCCGACTGCAAGGCCCGCAA	TRUE
cg20518446	0.00228152	0.031356	0.2585	0.584833	0.326333	37	11	62315034	GGGAAATCGCTGTAAATTAGGAGACTCAGCGTCCCGCAAGTGGGGAGGCG	11	62071610	AHNAK	NM_024060;NM_001620	TSS1500	Island	A_24_P943393	0.0250229	0.000136577	7.19787	down	NM_001620	NM_001620	NM_001620	Hs.502756	79026	AHNAK	AHNAK nucleoprotein	ENST00000378024	THC2462835	GO:0005515(protein binding)|GO:0005634(nucleus)|GO:0005737(cytoplasm)|GO:0005765(lysosomal membrane)|GO:0005829(cytosol)|GO:0005886(plasma membrane)|GO:0005925(focal adhesion)|GO:0015629(actin cytoskeleton)|GO:0016020(membrane)|GO:0030315(T-tubule)|GO:0031982(vesicle)|GO:0042383(sarcolemma)|GO:0043034(costamere)|GO:0043484(regulation of RNA splicing)|GO:0044291(cell-cell contact zone)|GO:0044548(…	Homo sapiens AHNAK nucleoprotein (AHNAK), transcript variant 1, mRNA [NM_001620]	chr11:62283459-62283400	hs|11q12.3	ATTTCCAGCACTTTAATGGCCAATTAACTGAGAATGTAAGAAAATTGATGCTGTACAAGG	TRUE
cg20518446	0.00228152	0.031356	0.2585	0.584833	0.326333	37	11	62315034	GGGAAATCGCTGTAAATTAGGAGACTCAGCGTCCCGCAAGTGGGGAGGCG	11	62071610	AHNAK	NM_024060;NM_001620	TSS1500	Island	A_24_P943393	0.0250229	0.000136577	7.19787	down	NM_001620	NM_001620	NM_001620	Hs.502756	79026	AHNAK	AHNAK nucleoprotein	ENST00000378024	THC2462835	GO:0005515(protein binding)|GO:0005634(nucleus)|GO:0005737(cytoplasm)|GO:0005765(lysosomal membrane)|GO:0005829(cytosol)|GO:0005886(plasma membrane)|GO:0005925(focal adhesion)|GO:0015629(actin cytoskeleton)|GO:0016020(membrane)|GO:0030315(T-tubule)|GO:0031982(vesicle)|GO:0042383(sarcolemma)|GO:0043034(costamere)|GO:0043484(regulation of RNA splicing)|GO:0044291(cell-cell contact zone)|GO:0044548(…	Homo sapiens AHNAK nucleoprotein (AHNAK), transcript variant 1, mRNA [NM_001620]	chr11:62283459-62283400	hs|11q12.3	ATTTCCAGCACTTTAATGGCCAATTAACTGAGAATGTAAGAAAATTGATGCTGTACAAGG	TRUE
cg00513208	0.000195354	0.0124643	-0.237167	0.500333	0.7375	37	10	12085641	GACATCGAAAGTCCTGCGGGGGGATTTCCAGAAGCACTTCTAGGTGTTCG	10	12125647	UPF2	NM_015542;NM_080599	TSS1500	S_Shore	A_33_P3218760	0.0280318	0.000383935	5.16425	up	NM_080599	NM_080599	NM_080599	Hs.370689	26019	UPF2	UPF2 regulator of nonsense transcripts homolog (yeast)	ENST00000397053	THC2644134	GO:0000184(nuclear-transcribed mRNA catabolic process, nonsense-mediated decay)|GO:0001889(liver development)|GO:0003723(RNA binding)|GO:0005515(protein binding)|GO:0005634(nucleus)|GO:0005737(cytoplasm)|GO:0005829(cytosol)|GO:0006406(mRNA export from nucleus)|GO:0010467(gene expression)|GO:0031100(organ regeneration)|GO:0035145(exon-exon junction complex)|GO:0048471(perinuclear region of cytopla…	Homo sapiens UPF2 regulator of nonsense transcripts homolog (yeast) (UPF2), transcript variant 1, mRNA [NM_080599]	chr10:12077296-12077237	hs|10p14	CTCACTGCCAAGAAGGAGGTCAGCAAGGCCCCTGAAGACAAGAAGAAGAGACTGGAAGAT	TRUE
cg00513208	0.000195354	0.0124643	-0.237167	0.500333	0.7375	37	10	12085641	GACATCGAAAGTCCTGCGGGGGGATTTCCAGAAGCACTTCTAGGTGTTCG	10	12125647	UPF2	NM_015542;NM_080599	TSS1500	S_Shore	A_33_P3218760	0.0280318	0.000383935	5.16425	up	NM_080599	NM_080599	NM_080599	Hs.370689	26019	UPF2	UPF2 regulator of nonsense transcripts homolog (yeast)	ENST00000397053	THC2644134	GO:0000184(nuclear-transcribed mRNA catabolic process, nonsense-mediated decay)|GO:0001889(liver development)|GO:0003723(RNA binding)|GO:0005515(protein binding)|GO:0005634(nucleus)|GO:0005737(cytoplasm)|GO:0005829(cytosol)|GO:0006406(mRNA export from nucleus)|GO:0010467(gene expression)|GO:0031100(organ regeneration)|GO:0035145(exon-exon junction complex)|GO:0048471(perinuclear region of cytopla…	Homo sapiens UPF2 regulator of nonsense transcripts homolog (yeast) (UPF2), transcript variant 1, mRNA [NM_080599]	chr10:12077296-12077237	hs|10p14	CTCACTGCCAAGAAGGAGGTCAGCAAGGCCCCTGAAGACAAGAAGAAGAGACTGGAAGAT	TRUE
cg26588061	1.58e-05	0.00697421	-0.2235	0.517167	0.740667	37	10	12086036	CGTGGGCTTGGGCACCAGGTGGGGCCCCCTCAAGTCAAGCAAACGTCAAG	10	12126042	UPF2	NM_015542;NM_080599	TSS1500	S_Shore	A_33_P3218760	0.0280318	0.000383935	5.16425	up	NM_080599	NM_080599	NM_080599	Hs.370689	26019	UPF2	UPF2 regulator of nonsense transcripts homolog (yeast)	ENST00000397053	THC2644134	GO:0000184(nuclear-transcribed mRNA catabolic process, nonsense-mediated decay)|GO:0001889(liver development)|GO:0003723(RNA binding)|GO:0005515(protein binding)|GO:0005634(nucleus)|GO:0005737(cytoplasm)|GO:0005829(cytosol)|GO:0006406(mRNA export from nucleus)|GO:0010467(gene expression)|GO:0031100(organ regeneration)|GO:0035145(exon-exon junction complex)|GO:0048471(perinuclear region of cytopla…	Homo sapiens UPF2 regulator of nonsense transcripts homolog (yeast) (UPF2), transcript variant 1, mRNA [NM_080599]	chr10:12077296-12077237	hs|10p14	CTCACTGCCAAGAAGGAGGTCAGCAAGGCCCCTGAAGACAAGAAGAAGAGACTGGAAGAT	TRUE
cg26588061	1.58e-05	0.00697421	-0.2235	0.517167	0.740667	37	10	12086036	CGTGGGCTTGGGCACCAGGTGGGGCCCCCTCAAGTCAAGCAAACGTCAAG	10	12126042	UPF2	NM_015542;NM_080599	TSS1500	S_Shore	A_33_P3218760	0.0280318	0.000383935	5.16425	up	NM_080599	NM_080599	NM_080599	Hs.370689	26019	UPF2	UPF2 regulator of nonsense transcripts homolog (yeast)	ENST00000397053	THC2644134	GO:0000184(nuclear-transcribed mRNA catabolic process, nonsense-mediated decay)|GO:0001889(liver development)|GO:0003723(RNA binding)|GO:0005515(protein binding)|GO:0005634(nucleus)|GO:0005737(cytoplasm)|GO:0005829(cytosol)|GO:0006406(mRNA export from nucleus)|GO:0010467(gene expression)|GO:0031100(organ regeneration)|GO:0035145(exon-exon junction complex)|GO:0048471(perinuclear region of cytopla…	Homo sapiens UPF2 regulator of nonsense transcripts homolog (yeast) (UPF2), transcript variant 1, mRNA [NM_080599]	chr10:12077296-12077237	hs|10p14	CTCACTGCCAAGAAGGAGGTCAGCAAGGCCCCTGAAGACAAGAAGAAGAGACTGGAAGAT	TRUE
cg03078169	0.000596921	0.0182316	0.220333	0.655833	0.4355	37	19	35629791	CGGGCTGTCCCCTGCTGAAAGAAGGCCCCCAAACGTCCTGCTGTGCCCCG	19	40321631	FXYD1	NM_021902;NM_021902;NM_005031	TSS1500	N_Shelf	A_33_P3228435	0.0254975	0.000205004	4.02531	down	NM_001278717	NM_001278717	NM_001278717	Hs.442498	5348	FXYD1	FXYD domain containing ion transport regulator 1	ENST00000587056	THC2471806	GO:0005254(chloride channel activity)|GO:0005886(plasma membrane)|GO:0005887(integral to plasma membrane)|GO:0005890(sodium:potassium-exchanging ATPase complex)|GO:0006821(chloride transport)|GO:0006874(cellular calcium ion homeostasis)|GO:0006936(muscle contraction)|GO:0008016(regulation of heart contraction)|GO:0017080(sodium channel regulator activity)|GO:0034220(ion transmembrane transport)|G…	Homo sapiens FXYD domain containing ion transport regulator 1 (FXYD1), transcript variant c, mRNA [NM_001278717]	chr19:35630984-35631043	hs|19q13.12	ATGGCGTCTCTTGGCCACATCTTGGTTTTCTGTGTGGGTCTCCTCACCATGGCCAAGGCA	TRUE
cg03289872	0.0012971	0.0244934	0.233333	0.381333	0.148	37	19	56989102	GGGCGAAGGACGCTGGCTGGCTGGAGGCAATAAGCCCTCACACGGGAACG	19	61680914	ZNF667	NM_022103;NR_030740	TSS1500	Island	A_33_P3231695	0.0364199	0.00173289	2.62275	down	NM_022103	NM_022103	NM_022103	Hs.676605	63934	ZNF667	zinc finger protein 667	ENST00000592189	THC2491798	GO:0003677(DNA binding)|GO:0003712(transcription cofactor activity)|GO:0005634(nucleus)|GO:0006351(transcription, DNA-dependent)|GO:0006357(regulation of transcription from RNA polymerase II promoter)|GO:0046872(metal ion binding)	Homo sapiens zinc finger protein 667 (ZNF667), transcript variant 1, mRNA [NM_022103]	chr19:56951398-56951339	hs|19q13.43	ATTAGGATTAGATGAGGTCATGAGGGTGGAGCCCTCGTGATGGGATTAGTGCCTTTATAA	TRUE
cg03289872	0.0012971	0.0244934	0.233333	0.381333	0.148	37	19	56989102	GGGCGAAGGACGCTGGCTGGCTGGAGGCAATAAGCCCTCACACGGGAACG	19	61680914	ZNF667	NM_022103;NR_030740	TSS1500	Island	A_33_P3231695	0.0364199	0.00173289	2.62275	down	NM_022103	NM_022103	NM_022103	Hs.676605	63934	ZNF667	zinc finger protein 667	ENST00000592189	THC2491798	GO:0003677(DNA binding)|GO:0003712(transcription cofactor activity)|GO:0005634(nucleus)|GO:0006351(transcription, DNA-dependent)|GO:0006357(regulation of transcription from RNA polymerase II promoter)|GO:0046872(metal ion binding)	Homo sapiens zinc finger protein 667 (ZNF667), transcript variant 1, mRNA [NM_022103]	chr19:56951398-56951339	hs|19q13.43	ATTAGGATTAGATGAGGTCATGAGGGTGGAGCCCTCGTGATGGGATTAGTGCCTTTATAA	TRUE
cg05080154	0.00142088	0.0254439	0.202667	0.466333	0.263667	37	18	76739409	ACGCCGGGGTGGCAGGACTTCGGCAAGACCAACTTTCCGGTTCGGAAGCG	18	74840397	SALL3	NM_171999	TSS1500	Island	A_33_P3296024	0.0299502	0.000647283	4.7738	down	NM_171999	NM_171999	NM_171999	Hs.700557	27164	SALL3	spalt-like transcription factor 3	ENST00000612458	THC2601042	GO:0003677(DNA binding)|GO:0005634(nucleus)|GO:0006351(transcription, DNA-dependent)|GO:0006355(regulation of transcription, DNA-dependent)|GO:0021891(olfactory bulb interneuron development)|GO:0035136(forelimb morphogenesis)|GO:0035137(hindlimb morphogenesis)|GO:0045879(negative regulation of smoothened signaling pathway)|GO:0046872(metal ion binding)	Homo sapiens spalt-like transcription factor 3 (SALL3), mRNA [NM_171999]	chr18:76757313-76757372	hs|18q23	TATCAACTAGCCAGTGACTCGCTCATCTGCCCTGCCCAGGCCCACGTTTTGAAGTTGGAG	TRUE
cg11493223	2.89e-05	0.00762092	-0.268667	0.218167	0.486833	37	17	76128522	CTGGGTCAGGGGGGCGGAGCCAGACCAGGGGCAGCAGCACGAAGCTTGCG	17	73640117	TMC6	NM_152468;NM_007267	TSS200	S_Shore	A_23_P101013	0.0310303	0.000790117	5.05428	up	NM_007267	NM_007267	NM_007267	Hs.632227	11322	TMC6	transmembrane channel-like 6	ENST00000591436	THC2751094	GO:0005515(protein binding)|GO:0005737(cytoplasm)|GO:0005783(endoplasmic reticulum)|GO:0005789(endoplasmic reticulum membrane)|GO:0005794(Golgi apparatus)|GO:0006811(ion transport)|GO:0008150(biological_process)|GO:0016021(integral to membrane)|GO:0031965(nuclear membrane)|GO:0070062(extracellular vesicular exosome)	Homo sapiens transmembrane channel-like 6 (TMC6), transcript variant 2, mRNA [NM_007267]	chr17:76113361-76109658	hs|17q25.3	CAGATCAGCAATGAGGGTGAGGACAAAATCTTCTTAATCAACAAGCTTCACTCCATCTAC	TRUE
cg24988684	2.93e-05	0.00762092	-0.235667	0.2245	0.460167	37	17	76128556	CGCCCCCCTGACCCAGGCCCCACCCTGAACTTGAGTGAGTGTGAGGCCCA	17	73640151	TMC6	NM_152468;NM_007267	TSS200	S_Shore	A_23_P101013	0.0310303	0.000790117	5.05428	up	NM_007267	NM_007267	NM_007267	Hs.632227	11322	TMC6	transmembrane channel-like 6	ENST00000591436	THC2751094	GO:0005515(protein binding)|GO:0005737(cytoplasm)|GO:0005783(endoplasmic reticulum)|GO:0005789(endoplasmic reticulum membrane)|GO:0005794(Golgi apparatus)|GO:0006811(ion transport)|GO:0008150(biological_process)|GO:0016021(integral to membrane)|GO:0031965(nuclear membrane)|GO:0070062(extracellular vesicular exosome)	Homo sapiens transmembrane channel-like 6 (TMC6), transcript variant 2, mRNA [NM_007267]	chr17:76113361-76109658	hs|17q25.3	CAGATCAGCAATGAGGGTGAGGACAAAATCTTCTTAATCAACAAGCTTCACTCCATCTAC	TRUE
cg08569678	0.000923101	0.0213452	-0.219833	0.306	0.525833	37	8	143781397	CAGGCAGGGGCCTTACTAGTAAGCACGTTTTGGGAAGTCCTCAGGGCACG	8	143778399	LY6K	NM_001160355;NM_001160354;NM_017527	TSS200	N_Shore	A_23_P397293	0.0290935	0.000508743	3.6593	up	NM_017527	NM_017527	NM_017527	Hs.69517	54742	LY6K	lymphocyte antigen 6 complex, locus K	ENST00000292430	THC2497468	GO:0005576(extracellular region)|GO:0005634(nucleus)|GO:0005730(nucleolus)|GO:0005737(cytoplasm)|GO:0005886(plasma membrane)|GO:0031225(anchored to membrane)	Homo sapiens lymphocyte antigen 6 complex, locus K (LY6K), transcript variant 1, mRNA [NM_017527]	chr8:143784821-143784880	hs|8q24.3	GAGCATGGACTCGCTCCAGACCGTTGTCACCTGTTGCATTAAACTTGTTTTCTGTTGATT	TRUE
cg08569678	0.000923101	0.0213452	-0.219833	0.306	0.525833	37	8	143781397	CAGGCAGGGGCCTTACTAGTAAGCACGTTTTGGGAAGTCCTCAGGGCACG	8	143778399	LY6K	NM_001160355;NM_001160354;NM_017527	TSS200	N_Shore	A_23_P397293	0.0290935	0.000508743	3.6593	up	NM_017527	NM_017527	NM_017527	Hs.69517	54742	LY6K	lymphocyte antigen 6 complex, locus K	ENST00000292430	THC2497468	GO:0005576(extracellular region)|GO:0005634(nucleus)|GO:0005730(nucleolus)|GO:0005737(cytoplasm)|GO:0005886(plasma membrane)|GO:0031225(anchored to membrane)	Homo sapiens lymphocyte antigen 6 complex, locus K (LY6K), transcript variant 1, mRNA [NM_017527]	chr8:143784821-143784880	hs|8q24.3	GAGCATGGACTCGCTCCAGACCGTTGTCACCTGTTGCATTAAACTTGTTTTCTGTTGATT	TRUE
cg08569678	0.000923101	0.0213452	-0.219833	0.306	0.525833	37	8	143781397	CAGGCAGGGGCCTTACTAGTAAGCACGTTTTGGGAAGTCCTCAGGGCACG	8	143778399	LY6K	NM_001160355;NM_001160354;NM_017527	TSS200	N_Shore	A_23_P397293	0.0290935	0.000508743	3.6593	up	NM_017527	NM_017527	NM_017527	Hs.69517	54742	LY6K	lymphocyte antigen 6 complex, locus K	ENST00000292430	THC2497468	GO:0005576(extracellular region)|GO:0005634(nucleus)|GO:0005730(nucleolus)|GO:0005737(cytoplasm)|GO:0005886(plasma membrane)|GO:0031225(anchored to membrane)	Homo sapiens lymphocyte antigen 6 complex, locus K (LY6K), transcript variant 1, mRNA [NM_017527]	chr8:143784821-143784880	hs|8q24.3	GAGCATGGACTCGCTCCAGACCGTTGTCACCTGTTGCATTAAACTTGTTTTCTGTTGATT	TRUE
cg24536349	6.58e-05	0.00916813	-0.2075	0.510667	0.718167	37	8	143781340	CGTGAGTAATCCTGTAAAACTCTCATCAAGAGGGTCTCCCCAGCGTGAGT	8	143778342	LY6K	NM_001160355;NM_001160354;NM_017527	TSS200	N_Shore	A_23_P397293	0.0290935	0.000508743	3.6593	up	NM_017527	NM_017527	NM_017527	Hs.69517	54742	LY6K	lymphocyte antigen 6 complex, locus K	ENST00000292430	THC2497468	GO:0005576(extracellular region)|GO:0005634(nucleus)|GO:0005730(nucleolus)|GO:0005737(cytoplasm)|GO:0005886(plasma membrane)|GO:0031225(anchored to membrane)	Homo sapiens lymphocyte antigen 6 complex, locus K (LY6K), transcript variant 1, mRNA [NM_017527]	chr8:143784821-143784880	hs|8q24.3	GAGCATGGACTCGCTCCAGACCGTTGTCACCTGTTGCATTAAACTTGTTTTCTGTTGATT	TRUE
cg24536349	6.58e-05	0.00916813	-0.2075	0.510667	0.718167	37	8	143781340	CGTGAGTAATCCTGTAAAACTCTCATCAAGAGGGTCTCCCCAGCGTGAGT	8	143778342	LY6K	NM_001160355;NM_001160354;NM_017527	TSS200	N_Shore	A_23_P397293	0.0290935	0.000508743	3.6593	up	NM_017527	NM_017527	NM_017527	Hs.69517	54742	LY6K	lymphocyte antigen 6 complex, locus K	ENST00000292430	THC2497468	GO:0005576(extracellular region)|GO:0005634(nucleus)|GO:0005730(nucleolus)|GO:0005737(cytoplasm)|GO:0005886(plasma membrane)|GO:0031225(anchored to membrane)	Homo sapiens lymphocyte antigen 6 complex, locus K (LY6K), transcript variant 1, mRNA [NM_017527]	chr8:143784821-143784880	hs|8q24.3	GAGCATGGACTCGCTCCAGACCGTTGTCACCTGTTGCATTAAACTTGTTTTCTGTTGATT	TRUE
cg24536349	6.58e-05	0.00916813	-0.2075	0.510667	0.718167	37	8	143781340	CGTGAGTAATCCTGTAAAACTCTCATCAAGAGGGTCTCCCCAGCGTGAGT	8	143778342	LY6K	NM_001160355;NM_001160354;NM_017527	TSS200	N_Shore	A_23_P397293	0.0290935	0.000508743	3.6593	up	NM_017527	NM_017527	NM_017527	Hs.69517	54742	LY6K	lymphocyte antigen 6 complex, locus K	ENST00000292430	THC2497468	GO:0005576(extracellular region)|GO:0005634(nucleus)|GO:0005730(nucleolus)|GO:0005737(cytoplasm)|GO:0005886(plasma membrane)|GO:0031225(anchored to membrane)	Homo sapiens lymphocyte antigen 6 complex, locus K (LY6K), transcript variant 1, mRNA [NM_017527]	chr8:143784821-143784880	hs|8q24.3	GAGCATGGACTCGCTCCAGACCGTTGTCACCTGTTGCATTAAACTTGTTTTCTGTTGATT	TRUE
cg10048215	6.95e-06	0.00646045	0.205833	0.846333	0.6405	37	12	12938383	ACATCCCGTATTTAGGAAACGAACATTGTGTGTTCGCTTTCCCCTGAACG	12	12829650	APOLD1	NM_001130415;NM_030817	TSS200	N_Shore	A_23_P48217	0.0258353	0.000236345	4.15087	down	NM_030817	NM_030817	NM_030817	Hs.23388	81575	APOLD1	apolipoprotein L domain containing 1	ENST00000326765	THC2550006	GO:0001525(angiogenesis)|GO:0001666(response to hypoxia)|GO:0005576(extracellular region)|GO:0005886(plasma membrane)|GO:0006869(lipid transport)|GO:0008289(lipid binding)|GO:0016021(integral to membrane)|GO:0030154(cell differentiation)|GO:0042118(endothelial cell activation)|GO:0042157(lipoprotein metabolic process)|GO:0045601(regulation of endothelial cell differentiation)	Homo sapiens apolipoprotein L domain containing 1 (APOLD1), transcript variant 2, mRNA [NM_030817]	chr12:12944179-12944238	hs|12p13.1	GAGTGGTTGTAGAAGTCTCCCTAAATCAGACATGTCAAGCAATCAGCCAACGTGGTGTAT	TRUE
cg13499300	0.00129325	0.0244603	0.242167	0.3075	0.0653333	37	19	54369556	CGCCGCTGGGCACCTTCCAGGGCCGACAACTGAGGAGGCTTTGAGGCCAA	19	59061368	MYADM	NM_001020820	TSS200	Island	A_24_P134195	0.033506	0.00117207	2.77431	down	NM_001020818	NM_001020818	NM_001020818	Hs.380906	91663	MYADM	myeloid-associated differentiation marker	ENST00000391771	THC2480965	GO:0001726(ruffle)|GO:0001933(negative regulation of protein phosphorylation)|GO:0003674(molecular_function)|GO:0005886(plasma membrane)|GO:0005911(cell-cell junction)|GO:0010629(negative regulation of gene expression)|GO:0010810(regulation of cell-substrate adhesion)|GO:0016021(integral to membrane)|GO:0030335(positive regulation of cell migration)|GO:0030837(negative regulation of actin filamen…	Homo sapiens myeloid-associated differentiation marker (MYADM), transcript variant 1, mRNA [NM_001020818]	chr19:54377897-54377956	hs|19q13.42	AATTCCTTGCACTCTAACCAGTTCTTGGATGCATCTTCTTCCTTCCCTTTCCTCTTGCTG	TRUE
cg26296488	0.000405557	0.0158264	0.231333	0.499667	0.268333	37	4	9783192	CGCTGAGGGCGGTGAGCGAGGGCGCCAAGGCACAGGTGGGGCGGGAGTCG	4	9392290	DRD5	NM_000798	TSS200	Island	A_24_P862886	0.0341166	0.00129144	3.19041	down	NM_000798	NM_000798	NM_000798	Hs.380681	1816	DRD5	dopamine receptor D5	ENST00000421395	NP511193	GO:0001588(dopamine receptor activity, coupled via Gs)|GO:0001963(synaptic transmission, dopaminergic)|GO:0001975(response to amphetamine)|GO:0001992(regulation of systemic arterial blood pressure by vasopressin)|GO:0001994(norepinephrine-epinephrine vasoconstriction involved in regulation of systemic arterial blood pressure)|GO:0004952(dopamine receptor activity)|GO:0005886(plasma membrane)|GO:0…	Homo sapiens dopamine receptor D5 (DRD5), mRNA [NM_000798]	chr4:9784811-9784870	hs|4p16.1	GGTGAACATCAGCAATGAGCTCATCTCCTACAACCAAGACATGGTCTTCCACAAGGAAAT	TRUE
cg15665400	2.52e-05	0.007461	-0.215167	0.173667	0.388833	37	2	133428652	AGCAGCCAGAGGCCGAGTCCGAGGCTGGGATGGCCTTTCAGGAGAGGACG	2	133145122	LYPD1	NM_144586;NM_001077427	TSS200	Island	A_32_P101031	0.0461332	0.00349044	2.29859	up	NM_144586	NM_144586	NM_144586	Hs.432395	116372	LYPD1	LY6/PLAUR domain containing 1	ENST00000397463	THC2466997	GO:0005886(plasma membrane)|GO:0031225(anchored to membrane)	Homo sapiens LY6/PLAUR domain containing 1 (LYPD1), transcript variant 1, mRNA [NM_144586]	chr2:133402490-133402431	hs|2q21.2	CACTGTTTCAAACCCGGGGGAGTTGGCTGTGTTAAAGAAAGACCATTAAATGCTTTAGAC	TRUE
cg00502665	0.00234582	0.0317363	0.209	0.327167	0.118167	37	19	56988813	GGGGCCTCAGGCCGGGGCTGGTGGTACTGTCCCCGAGAGGCGGGTGAGCG	19	61680625	ZNF667	NR_030740;NM_022103	TSS200	Island	A_33_P3231695	0.0364199	0.00173289	2.62275	down	NM_022103	NM_022103	NM_022103	Hs.676605	63934	ZNF667	zinc finger protein 667	ENST00000592189	THC2491798	GO:0003677(DNA binding)|GO:0003712(transcription cofactor activity)|GO:0005634(nucleus)|GO:0006351(transcription, DNA-dependent)|GO:0006357(regulation of transcription from RNA polymerase II promoter)|GO:0046872(metal ion binding)	Homo sapiens zinc finger protein 667 (ZNF667), transcript variant 1, mRNA [NM_022103]	chr19:56951398-56951339	hs|19q13.43	ATTAGGATTAGATGAGGTCATGAGGGTGGAGCCCTCGTGATGGGATTAGTGCCTTTATAA	TRUE
cg00502665	0.00234582	0.0317363	0.209	0.327167	0.118167	37	19	56988813	GGGGCCTCAGGCCGGGGCTGGTGGTACTGTCCCCGAGAGGCGGGTGAGCG	19	61680625	ZNF667	NR_030740;NM_022103	TSS200	Island	A_33_P3231695	0.0364199	0.00173289	2.62275	down	NM_022103	NM_022103	NM_022103	Hs.676605	63934	ZNF667	zinc finger protein 667	ENST00000592189	THC2491798	GO:0003677(DNA binding)|GO:0003712(transcription cofactor activity)|GO:0005634(nucleus)|GO:0006351(transcription, DNA-dependent)|GO:0006357(regulation of transcription from RNA polymerase II promoter)|GO:0046872(metal ion binding)	Homo sapiens zinc finger protein 667 (ZNF667), transcript variant 1, mRNA [NM_022103]	chr19:56951398-56951339	hs|19q13.43	ATTAGGATTAGATGAGGTCATGAGGGTGGAGCCCTCGTGATGGGATTAGTGCCTTTATAA	TRUE
cg07967091	0.0026535	0.0335774	0.222	0.427833	0.205833	37	19	56988956	CGCACACCGGTCTCCTAGGGGACTGGCGCCTGGCCCTGCTTTTCATCCTC	19	61680768	ZNF667	NR_030740;NM_022103	TSS200	Island	A_33_P3231695	0.0364199	0.00173289	2.62275	down	NM_022103	NM_022103	NM_022103	Hs.676605	63934	ZNF667	zinc finger protein 667	ENST00000592189	THC2491798	GO:0003677(DNA binding)|GO:0003712(transcription cofactor activity)|GO:0005634(nucleus)|GO:0006351(transcription, DNA-dependent)|GO:0006357(regulation of transcription from RNA polymerase II promoter)|GO:0046872(metal ion binding)	Homo sapiens zinc finger protein 667 (ZNF667), transcript variant 1, mRNA [NM_022103]	chr19:56951398-56951339	hs|19q13.43	ATTAGGATTAGATGAGGTCATGAGGGTGGAGCCCTCGTGATGGGATTAGTGCCTTTATAA	TRUE
cg07967091	0.0026535	0.0335774	0.222	0.427833	0.205833	37	19	56988956	CGCACACCGGTCTCCTAGGGGACTGGCGCCTGGCCCTGCTTTTCATCCTC	19	61680768	ZNF667	NR_030740;NM_022103	TSS200	Island	A_33_P3231695	0.0364199	0.00173289	2.62275	down	NM_022103	NM_022103	NM_022103	Hs.676605	63934	ZNF667	zinc finger protein 667	ENST00000592189	THC2491798	GO:0003677(DNA binding)|GO:0003712(transcription cofactor activity)|GO:0005634(nucleus)|GO:0006351(transcription, DNA-dependent)|GO:0006357(regulation of transcription from RNA polymerase II promoter)|GO:0046872(metal ion binding)	Homo sapiens zinc finger protein 667 (ZNF667), transcript variant 1, mRNA [NM_022103]	chr19:56951398-56951339	hs|19q13.43	ATTAGGATTAGATGAGGTCATGAGGGTGGAGCCCTCGTGATGGGATTAGTGCCTTTATAA	TRUE
cg06745704	2.39e-05	0.00736718	-0.265833	0.220833	0.486667	37	1	27668325	AGAACGGGTAGCAGCCCCACCTTGCCCACAACGGGGCTGATAGGAACTCG	1	27540912	SYTL1	NM_032872	TSS200		A_33_P3235321	0.0250229	0.000107334	5.64922	up	NM_032872	NM_032872	NM_032872	Hs.469175	84958	SYTL1	synaptotagmin-like 1	ENST00000496001	THC2782501	GO:0005515(protein binding)|GO:0005886(plasma membrane)|GO:0006886(intracellular protein transport)|GO:0006887(exocytosis)|GO:0017137(Rab GTPase binding)|GO:0019897(extrinsic to plasma membrane)|GO:0042043(neurexin family protein binding)|GO:0042470(melanosome)|GO:0070062(extracellular vesicular exosome)	Homo sapiens synaptotagmin-like 1 (SYTL1), transcript variant 2, mRNA [NM_032872]	chr1:27676916-27676975	hs|1p36.11	CAAGCGCAAGACGGCGGTGAAGAAACGGAATCTGAATCCGGTTTTCAACGAGACTCTCCG	TRUE
cg04608356	5.78e-05	0.00892986	-0.249	0.246667	0.495667	37	1	27668433	CGCCCCCGCAGCCGACTGGAGAGGCCCAGCTTGGCCCCAGCTCCACTGAG	1	27541020	SYTL1	NM_032872	TSS200		A_33_P3235321	0.0250229	0.000107334	5.64922	up	NM_032872	NM_032872	NM_032872	Hs.469175	84958	SYTL1	synaptotagmin-like 1	ENST00000496001	THC2782501	GO:0005515(protein binding)|GO:0005886(plasma membrane)|GO:0006886(intracellular protein transport)|GO:0006887(exocytosis)|GO:0017137(Rab GTPase binding)|GO:0019897(extrinsic to plasma membrane)|GO:0042043(neurexin family protein binding)|GO:0042470(melanosome)|GO:0070062(extracellular vesicular exosome)	Homo sapiens synaptotagmin-like 1 (SYTL1), transcript variant 2, mRNA [NM_032872]	chr1:27676916-27676975	hs|1p36.11	CAAGCGCAAGACGGCGGTGAAGAAACGGAATCTGAATCCGGTTTTCAACGAGACTCTCCG	TRUE
cg07961632	9.29e-06	0.00647865	-0.2325	0.153333	0.385833	37	1	27668421	CTAGAGGGCCTGCTCAGTGGAGCTGGGGCCAAGCTGGGCCTCTCCAGTCG	1	27541008	SYTL1	NM_032872	TSS200		A_33_P3235321	0.0250229	0.000107334	5.64922	up	NM_032872	NM_032872	NM_032872	Hs.469175	84958	SYTL1	synaptotagmin-like 1	ENST00000496001	THC2782501	GO:0005515(protein binding)|GO:0005886(plasma membrane)|GO:0006886(intracellular protein transport)|GO:0006887(exocytosis)|GO:0017137(Rab GTPase binding)|GO:0019897(extrinsic to plasma membrane)|GO:0042043(neurexin family protein binding)|GO:0042470(melanosome)|GO:0070062(extracellular vesicular exosome)	Homo sapiens synaptotagmin-like 1 (SYTL1), transcript variant 2, mRNA [NM_032872]	chr1:27676916-27676975	hs|1p36.11	CAAGCGCAAGACGGCGGTGAAGAAACGGAATCTGAATCCGGTTTTCAACGAGACTCTCCG	TRUE
cg19588399	6.3e-06	0.00646045	-0.211	0.211833	0.422833	37	1	27668445	GGAAACACCTCGGCAGGGCCTGATGCAAAACCGGGCCTGGACTCCCAGCG	1	27541032	SYTL1	NM_032872	TSS200		A_33_P3235321	0.0250229	0.000107334	5.64922	up	NM_032872	NM_032872	NM_032872	Hs.469175	84958	SYTL1	synaptotagmin-like 1	ENST00000496001	THC2782501	GO:0005515(protein binding)|GO:0005886(plasma membrane)|GO:0006886(intracellular protein transport)|GO:0006887(exocytosis)|GO:0017137(Rab GTPase binding)|GO:0019897(extrinsic to plasma membrane)|GO:0042043(neurexin family protein binding)|GO:0042470(melanosome)|GO:0070062(extracellular vesicular exosome)	Homo sapiens synaptotagmin-like 1 (SYTL1), transcript variant 2, mRNA [NM_032872]	chr1:27676916-27676975	hs|1p36.11	CAAGCGCAAGACGGCGGTGAAGAAACGGAATCTGAATCCGGTTTTCAACGAGACTCTCCG	TRUE
cg01614020	3.84e-05	0.00803425	0.200833	0.269	0.0681667	37	8	24814137	CGCAGGCTGCGTCAGGAGCCTCCCGGCGTATAAATAGGGGTGGCAGAACG	8	24870054	NEFL	NM_006158	TSS200	Island	A_33_P3287785	0.0254975	0.000212626	3.12388	down	NM_006158	NM_006158	NM_006158	Hs.521461	4747	NEFL	neurofilament, light polypeptide	ENST00000610854	THC2602498	GO:0000226(microtubule cytoskeleton organization)|GO:0005200(structural constituent of cytoskeleton)|GO:0005515(protein binding)|GO:0005737(cytoplasm)|GO:0005829(cytosol)|GO:0005883(neurofilament)|GO:0007268(synaptic transmission)|GO:0008022(protein C-terminus binding)|GO:0008089(anterograde axon cargo transport)|GO:0008090(retrograde axon cargo transport)|GO:0009636(response to toxin)|GO:0014012…	Homo sapiens neurofilament, light polypeptide (NEFL), mRNA [NM_006158]	chr8:24808537-24808478	hs|8p21.2	CTTGGTTGAAGTAAGAAAACTGTACCATCCTCTATCCTGTGTGCCATAATAAAATAGTAA	TRUE
cg14007067	0.000167887	0.0119983	0.241	0.353333	0.112333	37	18	76740258	GTGCTGGGGCTTGGCCTGCTTGCGCCGAGACATGCTGCTAGCGGCGCTCG	18	74841246	SALL3	NM_171999	TSS200	Island	A_33_P3296024	0.0299502	0.000647283	4.7738	down	NM_171999	NM_171999	NM_171999	Hs.700557	27164	SALL3	spalt-like transcription factor 3	ENST00000612458	THC2601042	GO:0003677(DNA binding)|GO:0005634(nucleus)|GO:0006351(transcription, DNA-dependent)|GO:0006355(regulation of transcription, DNA-dependent)|GO:0021891(olfactory bulb interneuron development)|GO:0035136(forelimb morphogenesis)|GO:0035137(hindlimb morphogenesis)|GO:0045879(negative regulation of smoothened signaling pathway)|GO:0046872(metal ion binding)	Homo sapiens spalt-like transcription factor 3 (SALL3), mRNA [NM_171999]	chr18:76757313-76757372	hs|18q23	TATCAACTAGCCAGTGACTCGCTCATCTGCCCTGCCCAGGCCCACGTTTTGAAGTTGGAG	TRUE
cg22500132	5.19e-05	0.00864305	-0.247667	0.266	0.513667	37	1	155162752	GGCGGGGTTTTGTCACCTGTCACCTGCTCCGGCTGTGCCTAGGGCGGGCG	1	153429376	MUC1	NM_001018016;NM_001044391;NM_001044393;NM_001044392;NM_001044390;NM_002456;NM_001018017	TSS200	N_Shore	A_33_P3332215	0.045702	0.00339765	3.93543	up	NM_001044392	NM_001044392	NM_001044392	Hs.89603	4582	MUC1	mucin 1, cell surface associated	ENST00000368396	NP1072856	GO:0000790(nuclear chromatin)|GO:0000978(RNA polymerase II core promoter proximal region sequence-specific DNA binding)|GO:0002039(p53 binding)|GO:0003712(transcription cofactor activity)|GO:0005515(protein binding)|GO:0005615(extracellular space)|GO:0005737(cytoplasm)|GO:0005796(Golgi lumen)|GO:0005887(integral to plasma membrane)|GO:0006493(protein O-linked glycosylation)|GO:0006977(DNA damage …	Homo sapiens mucin 1, cell surface associated (MUC1), transcript variant 7, mRNA [NM_001044392]	chr1:155162034-155161975	hs|1q22	AGAAAAGGAGACTTCGGCTACCCAGAGAAGTTCAGTGCCCAGCTCTACTGAGAAGAATGC	TRUE
cg22500132	5.19e-05	0.00864305	-0.247667	0.266	0.513667	37	1	155162752	GGCGGGGTTTTGTCACCTGTCACCTGCTCCGGCTGTGCCTAGGGCGGGCG	1	153429376	MUC1	NM_001018016;NM_001044391;NM_001044393;NM_001044392;NM_001044390;NM_002456;NM_001018017	TSS200	N_Shore	A_33_P3332215	0.045702	0.00339765	3.93543	up	NM_001044392	NM_001044392	NM_001044392	Hs.89603	4582	MUC1	mucin 1, cell surface associated	ENST00000368396	NP1072856	GO:0000790(nuclear chromatin)|GO:0000978(RNA polymerase II core promoter proximal region sequence-specific DNA binding)|GO:0002039(p53 binding)|GO:0003712(transcription cofactor activity)|GO:0005515(protein binding)|GO:0005615(extracellular space)|GO:0005737(cytoplasm)|GO:0005796(Golgi lumen)|GO:0005887(integral to plasma membrane)|GO:0006493(protein O-linked glycosylation)|GO:0006977(DNA damage …	Homo sapiens mucin 1, cell surface associated (MUC1), transcript variant 7, mRNA [NM_001044392]	chr1:155162034-155161975	hs|1q22	AGAAAAGGAGACTTCGGCTACCCAGAGAAGTTCAGTGCCCAGCTCTACTGAGAAGAATGC	TRUE
cg22500132	5.19e-05	0.00864305	-0.247667	0.266	0.513667	37	1	155162752	GGCGGGGTTTTGTCACCTGTCACCTGCTCCGGCTGTGCCTAGGGCGGGCG	1	153429376	MUC1	NM_001018016;NM_001044391;NM_001044393;NM_001044392;NM_001044390;NM_002456;NM_001018017	TSS200	N_Shore	A_33_P3332215	0.045702	0.00339765	3.93543	up	NM_001044392	NM_001044392	NM_001044392	Hs.89603	4582	MUC1	mucin 1, cell surface associated	ENST00000368396	NP1072856	GO:0000790(nuclear chromatin)|GO:0000978(RNA polymerase II core promoter proximal region sequence-specific DNA binding)|GO:0002039(p53 binding)|GO:0003712(transcription cofactor activity)|GO:0005515(protein binding)|GO:0005615(extracellular space)|GO:0005737(cytoplasm)|GO:0005796(Golgi lumen)|GO:0005887(integral to plasma membrane)|GO:0006493(protein O-linked glycosylation)|GO:0006977(DNA damage …	Homo sapiens mucin 1, cell surface associated (MUC1), transcript variant 7, mRNA [NM_001044392]	chr1:155162034-155161975	hs|1q22	AGAAAAGGAGACTTCGGCTACCCAGAGAAGTTCAGTGCCCAGCTCTACTGAGAAGAATGC	TRUE
cg22500132	5.19e-05	0.00864305	-0.247667	0.266	0.513667	37	1	155162752	GGCGGGGTTTTGTCACCTGTCACCTGCTCCGGCTGTGCCTAGGGCGGGCG	1	153429376	MUC1	NM_001018016;NM_001044391;NM_001044393;NM_001044392;NM_001044390;NM_002456;NM_001018017	TSS200	N_Shore	A_33_P3332215	0.045702	0.00339765	3.93543	up	NM_001044392	NM_001044392	NM_001044392	Hs.89603	4582	MUC1	mucin 1, cell surface associated	ENST00000368396	NP1072856	GO:0000790(nuclear chromatin)|GO:0000978(RNA polymerase II core promoter proximal region sequence-specific DNA binding)|GO:0002039(p53 binding)|GO:0003712(transcription cofactor activity)|GO:0005515(protein binding)|GO:0005615(extracellular space)|GO:0005737(cytoplasm)|GO:0005796(Golgi lumen)|GO:0005887(integral to plasma membrane)|GO:0006493(protein O-linked glycosylation)|GO:0006977(DNA damage …	Homo sapiens mucin 1, cell surface associated (MUC1), transcript variant 7, mRNA [NM_001044392]	chr1:155162034-155161975	hs|1q22	AGAAAAGGAGACTTCGGCTACCCAGAGAAGTTCAGTGCCCAGCTCTACTGAGAAGAATGC	TRUE
cg22500132	5.19e-05	0.00864305	-0.247667	0.266	0.513667	37	1	155162752	GGCGGGGTTTTGTCACCTGTCACCTGCTCCGGCTGTGCCTAGGGCGGGCG	1	153429376	MUC1	NM_001018016;NM_001044391;NM_001044393;NM_001044392;NM_001044390;NM_002456;NM_001018017	TSS200	N_Shore	A_33_P3332215	0.045702	0.00339765	3.93543	up	NM_001044392	NM_001044392	NM_001044392	Hs.89603	4582	MUC1	mucin 1, cell surface associated	ENST00000368396	NP1072856	GO:0000790(nuclear chromatin)|GO:0000978(RNA polymerase II core promoter proximal region sequence-specific DNA binding)|GO:0002039(p53 binding)|GO:0003712(transcription cofactor activity)|GO:0005515(protein binding)|GO:0005615(extracellular space)|GO:0005737(cytoplasm)|GO:0005796(Golgi lumen)|GO:0005887(integral to plasma membrane)|GO:0006493(protein O-linked glycosylation)|GO:0006977(DNA damage …	Homo sapiens mucin 1, cell surface associated (MUC1), transcript variant 7, mRNA [NM_001044392]	chr1:155162034-155161975	hs|1q22	AGAAAAGGAGACTTCGGCTACCCAGAGAAGTTCAGTGCCCAGCTCTACTGAGAAGAATGC	TRUE
cg22500132	5.19e-05	0.00864305	-0.247667	0.266	0.513667	37	1	155162752	GGCGGGGTTTTGTCACCTGTCACCTGCTCCGGCTGTGCCTAGGGCGGGCG	1	153429376	MUC1	NM_001018016;NM_001044391;NM_001044393;NM_001044392;NM_001044390;NM_002456;NM_001018017	TSS200	N_Shore	A_33_P3332215	0.045702	0.00339765	3.93543	up	NM_001044392	NM_001044392	NM_001044392	Hs.89603	4582	MUC1	mucin 1, cell surface associated	ENST00000368396	NP1072856	GO:0000790(nuclear chromatin)|GO:0000978(RNA polymerase II core promoter proximal region sequence-specific DNA binding)|GO:0002039(p53 binding)|GO:0003712(transcription cofactor activity)|GO:0005515(protein binding)|GO:0005615(extracellular space)|GO:0005737(cytoplasm)|GO:0005796(Golgi lumen)|GO:0005887(integral to plasma membrane)|GO:0006493(protein O-linked glycosylation)|GO:0006977(DNA damage …	Homo sapiens mucin 1, cell surface associated (MUC1), transcript variant 7, mRNA [NM_001044392]	chr1:155162034-155161975	hs|1q22	AGAAAAGGAGACTTCGGCTACCCAGAGAAGTTCAGTGCCCAGCTCTACTGAGAAGAATGC	TRUE
cg22500132	5.19e-05	0.00864305	-0.247667	0.266	0.513667	37	1	155162752	GGCGGGGTTTTGTCACCTGTCACCTGCTCCGGCTGTGCCTAGGGCGGGCG	1	153429376	MUC1	NM_001018016;NM_001044391;NM_001044393;NM_001044392;NM_001044390;NM_002456;NM_001018017	TSS200	N_Shore	A_33_P3332215	0.045702	0.00339765	3.93543	up	NM_001044392	NM_001044392	NM_001044392	Hs.89603	4582	MUC1	mucin 1, cell surface associated	ENST00000368396	NP1072856	GO:0000790(nuclear chromatin)|GO:0000978(RNA polymerase II core promoter proximal region sequence-specific DNA binding)|GO:0002039(p53 binding)|GO:0003712(transcription cofactor activity)|GO:0005515(protein binding)|GO:0005615(extracellular space)|GO:0005737(cytoplasm)|GO:0005796(Golgi lumen)|GO:0005887(integral to plasma membrane)|GO:0006493(protein O-linked glycosylation)|GO:0006977(DNA damage …	Homo sapiens mucin 1, cell surface associated (MUC1), transcript variant 7, mRNA [NM_001044392]	chr1:155162034-155161975	hs|1q22	AGAAAAGGAGACTTCGGCTACCCAGAGAAGTTCAGTGCCCAGCTCTACTGAGAAGAATGC	TRUE
cg22531371	9.67e-05	0.010176	-0.210667	0.2405	0.451167	37	1	155162756	AGGGGGCGGGGTTTTGTCACCTGTCACCTGCTCCGGCTGTGCCTAGGGCG	1	153429380	MUC1	NM_001018016;NM_001044391;NM_001044393;NM_001044392;NM_001044390;NM_002456;NM_001018017	TSS200	N_Shore	A_33_P3332215	0.045702	0.00339765	3.93543	up	NM_001044392	NM_001044392	NM_001044392	Hs.89603	4582	MUC1	mucin 1, cell surface associated	ENST00000368396	NP1072856	GO:0000790(nuclear chromatin)|GO:0000978(RNA polymerase II core promoter proximal region sequence-specific DNA binding)|GO:0002039(p53 binding)|GO:0003712(transcription cofactor activity)|GO:0005515(protein binding)|GO:0005615(extracellular space)|GO:0005737(cytoplasm)|GO:0005796(Golgi lumen)|GO:0005887(integral to plasma membrane)|GO:0006493(protein O-linked glycosylation)|GO:0006977(DNA damage …	Homo sapiens mucin 1, cell surface associated (MUC1), transcript variant 7, mRNA [NM_001044392]	chr1:155162034-155161975	hs|1q22	AGAAAAGGAGACTTCGGCTACCCAGAGAAGTTCAGTGCCCAGCTCTACTGAGAAGAATGC	TRUE
cg22531371	9.67e-05	0.010176	-0.210667	0.2405	0.451167	37	1	155162756	AGGGGGCGGGGTTTTGTCACCTGTCACCTGCTCCGGCTGTGCCTAGGGCG	1	153429380	MUC1	NM_001018016;NM_001044391;NM_001044393;NM_001044392;NM_001044390;NM_002456;NM_001018017	TSS200	N_Shore	A_33_P3332215	0.045702	0.00339765	3.93543	up	NM_001044392	NM_001044392	NM_001044392	Hs.89603	4582	MUC1	mucin 1, cell surface associated	ENST00000368396	NP1072856	GO:0000790(nuclear chromatin)|GO:0000978(RNA polymerase II core promoter proximal region sequence-specific DNA binding)|GO:0002039(p53 binding)|GO:0003712(transcription cofactor activity)|GO:0005515(protein binding)|GO:0005615(extracellular space)|GO:0005737(cytoplasm)|GO:0005796(Golgi lumen)|GO:0005887(integral to plasma membrane)|GO:0006493(protein O-linked glycosylation)|GO:0006977(DNA damage …	Homo sapiens mucin 1, cell surface associated (MUC1), transcript variant 7, mRNA [NM_001044392]	chr1:155162034-155161975	hs|1q22	AGAAAAGGAGACTTCGGCTACCCAGAGAAGTTCAGTGCCCAGCTCTACTGAGAAGAATGC	TRUE
cg22531371	9.67e-05	0.010176	-0.210667	0.2405	0.451167	37	1	155162756	AGGGGGCGGGGTTTTGTCACCTGTCACCTGCTCCGGCTGTGCCTAGGGCG	1	153429380	MUC1	NM_001018016;NM_001044391;NM_001044393;NM_001044392;NM_001044390;NM_002456;NM_001018017	TSS200	N_Shore	A_33_P3332215	0.045702	0.00339765	3.93543	up	NM_001044392	NM_001044392	NM_001044392	Hs.89603	4582	MUC1	mucin 1, cell surface associated	ENST00000368396	NP1072856	GO:0000790(nuclear chromatin)|GO:0000978(RNA polymerase II core promoter proximal region sequence-specific DNA binding)|GO:0002039(p53 binding)|GO:0003712(transcription cofactor activity)|GO:0005515(protein binding)|GO:0005615(extracellular space)|GO:0005737(cytoplasm)|GO:0005796(Golgi lumen)|GO:0005887(integral to plasma membrane)|GO:0006493(protein O-linked glycosylation)|GO:0006977(DNA damage …	Homo sapiens mucin 1, cell surface associated (MUC1), transcript variant 7, mRNA [NM_001044392]	chr1:155162034-155161975	hs|1q22	AGAAAAGGAGACTTCGGCTACCCAGAGAAGTTCAGTGCCCAGCTCTACTGAGAAGAATGC	TRUE
cg22531371	9.67e-05	0.010176	-0.210667	0.2405	0.451167	37	1	155162756	AGGGGGCGGGGTTTTGTCACCTGTCACCTGCTCCGGCTGTGCCTAGGGCG	1	153429380	MUC1	NM_001018016;NM_001044391;NM_001044393;NM_001044392;NM_001044390;NM_002456;NM_001018017	TSS200	N_Shore	A_33_P3332215	0.045702	0.00339765	3.93543	up	NM_001044392	NM_001044392	NM_001044392	Hs.89603	4582	MUC1	mucin 1, cell surface associated	ENST00000368396	NP1072856	GO:0000790(nuclear chromatin)|GO:0000978(RNA polymerase II core promoter proximal region sequence-specific DNA binding)|GO:0002039(p53 binding)|GO:0003712(transcription cofactor activity)|GO:0005515(protein binding)|GO:0005615(extracellular space)|GO:0005737(cytoplasm)|GO:0005796(Golgi lumen)|GO:0005887(integral to plasma membrane)|GO:0006493(protein O-linked glycosylation)|GO:0006977(DNA damage …	Homo sapiens mucin 1, cell surface associated (MUC1), transcript variant 7, mRNA [NM_001044392]	chr1:155162034-155161975	hs|1q22	AGAAAAGGAGACTTCGGCTACCCAGAGAAGTTCAGTGCCCAGCTCTACTGAGAAGAATGC	TRUE
cg22531371	9.67e-05	0.010176	-0.210667	0.2405	0.451167	37	1	155162756	AGGGGGCGGGGTTTTGTCACCTGTCACCTGCTCCGGCTGTGCCTAGGGCG	1	153429380	MUC1	NM_001018016;NM_001044391;NM_001044393;NM_001044392;NM_001044390;NM_002456;NM_001018017	TSS200	N_Shore	A_33_P3332215	0.045702	0.00339765	3.93543	up	NM_001044392	NM_001044392	NM_001044392	Hs.89603	4582	MUC1	mucin 1, cell surface associated	ENST00000368396	NP1072856	GO:0000790(nuclear chromatin)|GO:0000978(RNA polymerase II core promoter proximal region sequence-specific DNA binding)|GO:0002039(p53 binding)|GO:0003712(transcription cofactor activity)|GO:0005515(protein binding)|GO:0005615(extracellular space)|GO:0005737(cytoplasm)|GO:0005796(Golgi lumen)|GO:0005887(integral to plasma membrane)|GO:0006493(protein O-linked glycosylation)|GO:0006977(DNA damage …	Homo sapiens mucin 1, cell surface associated (MUC1), transcript variant 7, mRNA [NM_001044392]	chr1:155162034-155161975	hs|1q22	AGAAAAGGAGACTTCGGCTACCCAGAGAAGTTCAGTGCCCAGCTCTACTGAGAAGAATGC	TRUE
cg22531371	9.67e-05	0.010176	-0.210667	0.2405	0.451167	37	1	155162756	AGGGGGCGGGGTTTTGTCACCTGTCACCTGCTCCGGCTGTGCCTAGGGCG	1	153429380	MUC1	NM_001018016;NM_001044391;NM_001044393;NM_001044392;NM_001044390;NM_002456;NM_001018017	TSS200	N_Shore	A_33_P3332215	0.045702	0.00339765	3.93543	up	NM_001044392	NM_001044392	NM_001044392	Hs.89603	4582	MUC1	mucin 1, cell surface associated	ENST00000368396	NP1072856	GO:0000790(nuclear chromatin)|GO:0000978(RNA polymerase II core promoter proximal region sequence-specific DNA binding)|GO:0002039(p53 binding)|GO:0003712(transcription cofactor activity)|GO:0005515(protein binding)|GO:0005615(extracellular space)|GO:0005737(cytoplasm)|GO:0005796(Golgi lumen)|GO:0005887(integral to plasma membrane)|GO:0006493(protein O-linked glycosylation)|GO:0006977(DNA damage …	Homo sapiens mucin 1, cell surface associated (MUC1), transcript variant 7, mRNA [NM_001044392]	chr1:155162034-155161975	hs|1q22	AGAAAAGGAGACTTCGGCTACCCAGAGAAGTTCAGTGCCCAGCTCTACTGAGAAGAATGC	TRUE
cg22531371	9.67e-05	0.010176	-0.210667	0.2405	0.451167	37	1	155162756	AGGGGGCGGGGTTTTGTCACCTGTCACCTGCTCCGGCTGTGCCTAGGGCG	1	153429380	MUC1	NM_001018016;NM_001044391;NM_001044393;NM_001044392;NM_001044390;NM_002456;NM_001018017	TSS200	N_Shore	A_33_P3332215	0.045702	0.00339765	3.93543	up	NM_001044392	NM_001044392	NM_001044392	Hs.89603	4582	MUC1	mucin 1, cell surface associated	ENST00000368396	NP1072856	GO:0000790(nuclear chromatin)|GO:0000978(RNA polymerase II core promoter proximal region sequence-specific DNA binding)|GO:0002039(p53 binding)|GO:0003712(transcription cofactor activity)|GO:0005515(protein binding)|GO:0005615(extracellular space)|GO:0005737(cytoplasm)|GO:0005796(Golgi lumen)|GO:0005887(integral to plasma membrane)|GO:0006493(protein O-linked glycosylation)|GO:0006977(DNA damage …	Homo sapiens mucin 1, cell surface associated (MUC1), transcript variant 7, mRNA [NM_001044392]	chr1:155162034-155161975	hs|1q22	AGAAAAGGAGACTTCGGCTACCCAGAGAAGTTCAGTGCCCAGCTCTACTGAGAAGAATGC	TRUE
cg21553182	0.000175416	0.0121079	0.218333	0.327167	0.108833	37	19	52956821	CGGGTCTTCAGGAAACTGCGCTTGCGAGTTCACGCCCCATGATTCACTTC	19	57648633	ZNF578	NM_001099694	TSS200	Island	A_33_P3345132	0.0302229	0.000674453	2.53956	down	NM_001099694	NM_001099694	NM_001099694	Hs.157287	147660	ZNF578	zinc finger protein 578		THC2742978	GO:0003677(DNA binding)|GO:0005634(nucleus)|GO:0005737(cytoplasm)|GO:0006351(transcription, DNA-dependent)|GO:0006355(regulation of transcription, DNA-dependent)|GO:0046872(metal ion binding)	Homo sapiens zinc finger protein 578 (ZNF578), mRNA [NM_001099694]	chr19:53019319-53019378	hs|19q13.41	AGTCACATTTGCTTTTCTCTTTTCCCAAACATCAAAACCCTTCCTGTCTCAGGTCATTGT	TRUE
cg02207219	0.000359343	0.0152201	-0.2245	0.534833	0.759333	37	6	30080968	CGGGGCACCAAACACCACTTATGGGGGATTTCCCAATCAGCTCTGAGTAG	6	30188947	TRIM31	NM_007028	TSS200		A_33_P3354451	0.0428713	0.00280595	2.40897	up	NM_007028	NM_007028	NM_007028	Hs.493275	11074	TRIM31	tripartite motif containing 31	ENST00000357569	THC2473059	GO:0005739(mitochondrion)|GO:0005829(cytosol)|GO:0008270(zinc ion binding)|GO:0016567(protein ubiquitination)|GO:0016874(ligase activity)|GO:0019221(cytokine-mediated signaling pathway)|GO:0032897(negative regulation of viral transcription)|GO:0045087(innate immune response)|GO:0046597(negative regulation of viral entry into host cell)|GO:0051091(positive regulation of sequence-specific DNA bindi…	Homo sapiens tripartite motif containing 31 (TRIM31), mRNA [NM_007028]	chr6:30070983-30070924	hs|6p22.1	AAGCAGCTGTTTACCGAAGGCACCAGTTCAGCCAGGAGTGAAATCCGGAGAGGAGCAACG	TRUE
cg21368161	1.55e-05	0.00695433	-0.232333	0.236333	0.468667	37	7	1596136	CGGCCCTCCTTGGCCTGCCGCAGACCTCTCCCACGTGTCCCCACCAGGTG	7	1562662	TMEM184A	NM_001097620	TSS200		A_33_P3361337	0.0463974	0.00354665	2.17937	up	NM_001097620	NM_001097620	NM_001097620	Hs.592174	202915	TMEM184A	transmembrane protein 184A	ENST00000468535	THC2625930	GO:0016021(integral to membrane)	Homo sapiens transmembrane protein 184A (TMEM184A), mRNA [NM_001097620]	chr7:1586647-1586588	hs|7p22.3	GGGAGCAGGAAGAGCCGGAGCCTGGAGAAGCGGATGCTGATCCCCTCGGAGGACCTGTAG	TRUE
cg12503394	0.000108208	0.0104874	-0.2155	0.3485	0.564	37	7	1596118	AGACGGCCAGGCAGCTGCCACCTGGTGGGGACACGTGGGAGAGGTCTGCG	7	1562644	TMEM184A	NM_001097620	TSS200		A_33_P3361337	0.0463974	0.00354665	2.17937	up	NM_001097620	NM_001097620	NM_001097620	Hs.592174	202915	TMEM184A	transmembrane protein 184A	ENST00000468535	THC2625930	GO:0016021(integral to membrane)	Homo sapiens transmembrane protein 184A (TMEM184A), mRNA [NM_001097620]	chr7:1586647-1586588	hs|7p22.3	GGGAGCAGGAAGAGCCGGAGCCTGGAGAAGCGGATGCTGATCCCCTCGGAGGACCTGTAG	TRUE
cg06194808	0.000411522	0.0158786	-0.205333	0.541833	0.747167	37	7	1596217	CGGCAGGCACACAGCACTGTGGATATACTTACCGCCACCGAATCGTTCAC	7	1562743	TMEM184A	NM_001097620	TSS200		A_33_P3361337	0.0463974	0.00354665	2.17937	up	NM_001097620	NM_001097620	NM_001097620	Hs.592174	202915	TMEM184A	transmembrane protein 184A	ENST00000468535	THC2625930	GO:0016021(integral to membrane)	Homo sapiens transmembrane protein 184A (TMEM184A), mRNA [NM_001097620]	chr7:1586647-1586588	hs|7p22.3	GGGAGCAGGAAGAGCCGGAGCCTGGAGAAGCGGATGCTGATCCCCTCGGAGGACCTGTAG	TRUE
